# 1 **Intron-assisted, viroid-based production of insecticidal circular double-** 2 **stranded RNA in *Escherichia coli***

3  
4 **Beltrán Ortolá<sup>a</sup>, Teresa Cordero<sup>a</sup>, Xu Hu<sup>b</sup> and José-Antonio Daròs<sup>a</sup>**

5  
6 <sup>a</sup>Instituto de Biología Molecular y Celular de Plantas (Consejo Superior de Investigaciones  
7 Científicas-Universitat Politècnica de Valencia), Valencia, Spain; <sup>b</sup>Corteva Agriscience,  
8 Johnston, Iowa, USA

9  
10 **CONTACT:** José-Antonio Daròs, [jadaros@ibmcp.upv.es](mailto:jadaros@ibmcp.upv.es), IBMCP (CSIC-Universitat  
11 Politècnica de Valencia), Avenida de los Naranjos s/n, 46022 Valencia, Spain

## 12 13 **ABSTRACT**

14 RNA interference (RNAi) is a natural mechanism for protecting against harmful genetic  
15 elements and regulating gene expression, which can be artificially triggered by the delivery of  
16 homologous double-stranded RNA (dsRNA). This mechanism can be exploited as a highly  
17 specific and environmentally friendly pest control strategy. To this aim, systems for producing  
18 large amounts of recombinant dsRNA are necessary. We describe a system to efficiently  
19 produce large amounts of circular dsRNA in *Escherichia coli* and demonstrate the efficient  
20 insecticidal activity of these molecules against Western corn rootworm (WCR, *Diabrotica*  
21 *virgifera virgifera* LeConte), a highly damaging pest of corn crops. In our system, the two  
22 strands of the dsRNA are expressed in *E. coli* embedded within the very stable scaffold of  
23 *Eggplant latent viroid* (ELVd), a small circular non-coding RNA. Stability in *E. coli* of the  
24 corresponding plasmids with long inverted repeats was achieved by using a cDNA coding for  
25 a group-I autocatalytic intron from *Tetrahymena thermophila* as a spacer. RNA circularization  
26 and large-scale accumulation in *E. coli* cells was facilitated by co-expression of eggplant tRNA  
27 ligase, the enzyme that ligates ELVd during replication in the host plant. The inserted intron  
28 efficiently self-spliced from the RNA product during transcription. Circular RNAs containing  
29 a dsRNA moiety homologous to *smooth septate junction 1* (*DvSSJ1*) gene exhibited excellent  
30 insecticide activity against WCR larvae. Finally, we show that the viroid scaffold can be  
31 separated from the final circular dsRNA product using a second *T. thermophila* self-splicing  
32 intron in a permuted form.

33

34 **KEYWORDS:** RNA interference; double-stranded RNA; *Eggplant latent viroid*; group-I self-  
35 splicing intron; intron-exon permutation; *Escherichia coli*; *Diabrotica virgifera*

36

## 37 **Introduction**

38

39 RNA silencing, also known as RNA interference (RNAi), is a eukaryotic natural defense  
40 mechanism against exogenous RNA and transposon mobilization that has evolved to also  
41 regulate gene expression. RNAi is induced by the presence of highly structured or double-  
42 stranded RNA (dsRNA) and typically results in the silencing of homologous genes [1]. Since  
43 efficient silencing can be equally induced by endogenously transcribed or exogenously  
44 delivered RNA, RNAi-mediated gene knockdown is frequently used in many organisms for  
45 basic research to study gene function, as well as for biotechnological applications, from  
46 therapeutics [2] to plant breeding [3]. More specifically, in recent years, remarkable progress  
47 has been made in the use of exogenously supplied dsRNA as a highly specific and  
48 environmentally friendly anti-pest and anti-pathogen agent in agriculture [4–6]. The ingestion  
49 of long dsRNAs by nematodes, insects, or other arthropods induces silencing of endogenous  
50 homologous genes, which may cause pest death or, at least, affect development, feeding,  
51 mobility, or progeny production, reducing crop damage in any case [7].

52 The dsRNA molecules required for RNAi applications can be obtained via chemical  
53 synthesis or bi-directional *in vitro* transcription. Both strategies generate two complementary  
54 RNAs that must be subsequently hybridized. These strategies are time-consuming, expensive,  
55 and particularly difficult to scale up to produce the large amounts of dsRNAs required, for  
56 example, in pest control. A more feasible strategy is *in vivo* production using a biofactory  
57 system, such as the bacteria *Escherichia coli* [8]. In this approach, the dsRNA can be expressed  
58 from a single transcriptional unit, which results in a hairpin RNA consisting of two  
59 complementary strands of the target sequence separated by a single-stranded loop [9–12].  
60 However, the presence of inverted repeats in plasmid vectors significantly damages stability  
61 [13,14]. Alternatively, the two complementary RNA strands are usually synthesized *in vivo*  
62 from two promoters in inverted orientations [15–17]. Again, this strategy requires hybridization  
63 of both complementary strands, thereby lowering efficiency and rendering the whole process  
64 prone to degradation.

65 We have recently developed a system to produce large amounts of recombinant RNA in  
66 *E. coli* based on elements of viroid biology [18,19]. Viroids are a unique class of plant infectious  
67 agents that are exclusively composed of a relatively small (246–434 nt) circular non-coding

68 RNA molecule [20–22]. Our RNA production system is based on co-expression in *E. coli* of an  
69 *Eggplant latent viroid* (ELVd) [23] scaffold, in which the RNA of interest is grafted, along with  
70 the eggplant (*Solanum melongena* L.) tRNA ligase, the host enzyme involved in viroid  
71 circularization in the infected plant [24,25]. Although there is no ELVd replication in *E. coli*,  
72 the viroid-derived RNA can be efficiently transcribed in these bacteria and it undergoes  
73 processing through the embedded hammerhead ribozymes. The resulting monomers that  
74 contain the RNA of interest are recognized by the tRNA ligase and circularized. The expression  
75 product likely remains bound to the tRNA ligase, forming a ribonucleoprotein complex that  
76 reaches high concentration in *E. coli* cells. Using this system, tens of milligrams of RNAs of  
77 interest, such as RNA aptamers, can be easily obtained per liter of *E. coli* culture under regular  
78 laboratory conditions [18,26]. We aim to apply this system for producing the large amounts of  
79 dsRNAs required to fight Western corn rootworm (WCR; *Diabrotica virgifera virgifera*  
80 LeConte; Coleoptera: Chrysomelidae), using RNAi strategies. WCR is considered one of the  
81 most harmful insect pests of cultivated corn in the USA and it has received increasing attention  
82 globally because of repeated invasion events outside this country [27]. However, despite our  
83 initial success in producing recombinant hairpin RNAs of small length, we experienced major  
84 difficulties in building the expression plasmids that contain long inverted repeats. Thus, we first  
85 aimed to adapt the viroid-based system for the large-scale production in *E. coli* of hairpin RNAs  
86 with long double-stranded regions, which are required in anti-pest RNAi approaches. Second,  
87 we sought to use these recombinant RNAs to fight WCR. Third, we refined the *in vivo*  
88 production system to automatically remove the viroid scaffold from the dsRNA product.

89 We show that plasmids with long inverted repeats become completely stable in *E. coli*  
90 when the corresponding sequences are separated by a sequence coding for a group-I self-  
91 splicing intron. Interestingly, this intron self-splices with extremely high efficiency after  
92 transcription *in vivo*, facilitating the formation of an RNA product that contains the long hairpin  
93 RNA and that accumulates to high concentration in *E. coli*. We also demonstrate that the  
94 resulting RNA product, which consists of a structured viroid-derived scaffold from which the  
95 dsRNA protrudes, shows a potent insecticide activity against WCR larvae. Finally, we show  
96 that the dsRNA of interest can be efficiently excised from the viroid scaffold through the  
97 addition of a permuted version of the same intron flanking the inverted repeats; this yields a  
98 highly-stable and compact circular molecule consisting of a perfect dsRNA locked at both ends  
99 with small terminal single-stranded loops.

100

101 **Results**

102

103 *Plasmids with long inverted repeats are stabilized in E. coli when these sequences are*  
104 *separated by a cDNA corresponding to a self-splicing group-I intron*

105

106 *D. virgifera smooth septate junction 1 (DvSSJ1)* gene encodes a membrane protein associated  
107 with smooth septate junctions, which are required for intestinal barrier function. Ingestion by  
108 WCR larvae of dsRNA homologous to *DvSSJ1* induces mRNA suppression and larval growth  
109 inhibition and mortality [28–30]. Using the viroid-derived system to produce recombinant RNA  
110 in *E. coli*, we attempted to produce the large amounts of various dsRNAs homologous to  
111 *DvSSJ1* to analyze their anti-WCR activity via oral feeding of insect larvae. However, we were  
112 unable to obtain the corresponding expression plasmids with long inverted repeat sequences,  
113 although we tried multiple cloning strategies, *E. coli* strains, and growth conditions. We  
114 reasoned that plasmid instability would revert if inverted repeats were separated by a  
115 sufficiently long spacer sequence. Inspired by previous work to produce hairpin RNAs in  
116 plants—in which inverted repeats were separated by a cDNA corresponding to a plant intron  
117 that efficiently spliced when the RNA was transcribed in the plant cells [31]—we searched for  
118 introns potentially able to self-splice in *E. coli*. We selected the group-I *Tetrahymena*  
119 *thermophila* 26S rRNA intron [32].

120 In contrast to previous fruitless results, we easily obtained a plasmid in which 83-nt  
121 inverted repeats homologous to *DvSSJ1* were separated by a 433-bp cDNA that corresponded  
122 to the *T. thermophila* 26S rRNA intron (GenBank accession number V01416.1), plus both 10-  
123 nt native flanking exons. To build this plasmid, we electroporated the product of a Gibson  
124 assembly reaction in *E. coli* and selected transformed clones in plates containing ampicillin.  
125 Electrophoretic analysis of recombinant plasmids from 12 independent *E. coli* colonies showed  
126 that all were the same size and exhibited a migration delay consistent with the inserted cDNA  
127 (Supplemental Figure S1, compare lane 1 with lanes 2 to 13). The expected sequence was  
128 confirmed in one of these plasmids, hereafter named pLELVd-DvSSJ1 (Supplemental Dataset  
129 S1).

130

131 *Remarkable amounts of the dsRNA of interest, inserted into the ELVd molecule, accumulate*  
132 *in E. coli when co-expressed with tRNA ligase*

133

134 We used pLELVd-DvSSJ1 to co-electroporate the RNase III-deficient strain of *E. coli*  
135 HT115(DE3), along with plasmid p15LtRnlSm (Supplemental Dataset S1), from which

136 eggplant tRNA ligase is constitutively expressed. As controls, p15LtRnlSm was also co-  
137 electroporated with the empty expression plasmid (pLPP) or the plasmid to express empty  
138 ELVd (pLELVd), with no RNA of interest inserted ([Supplemental Dataset S1](#)). Three  
139 independent colonies were selected from plates containing ampicillin and chloramphenicol and  
140 grown for 24 h in Terrific Broth (TB). We extracted total RNA from the cells and analyzed it  
141 by polyacrylamide gel electrophoresis (PAGE) in denaturing conditions (8 M urea). Two  
142 prominent bands above the 600-nt and slightly below the 400-nt RNA markers were observed  
143 in the lanes containing RNA from bacteria transformed with pLELVd-DvSSJ1 ([Figure 1\(a\)](#),  
144 lanes 7 to 9, orange and black arrows, respectively). Note that these bands exhibited a  
145 fluorescence signal higher than those corresponding to endogenous *E. coli* rRNAs ([Figure 1\(a\)](#),  
146 upper part of the gel), indicating a large accumulation *in vivo*. RNA extracts from the empty  
147 ELVd controls exhibited a single prominent band above the 400-nt marker that, according to  
148 our previous analyses [33,34], corresponds to the 333-nt circular ELVd RNA ([Figure 1\(a\)](#), lanes  
149 4 to 6, white arrow). In denaturing conditions, circular RNAs migrate more slowly than the  
150 linear counterparts of the same size. Finally, RNA extracts from the empty plasmid control did  
151 not exhibit any particular prominent band ([Figure 1\(a\)](#), lanes 1 to 3).

152 To confirm the identity of the expressed RNA species, we also analyzed the RNA  
153 preparations by northern blot hybridization, using radioactive RNA probes complementary to  
154 ELVd and the sense strand of the *DvSSJ1*-derived dsRNA. While the ELVd probe hybridized  
155 with the prominent RNA band in the empty ELVd controls and the slowly migrating band in  
156 the ELVd-DvSSJ1 samples ([Figure 1\(b\)](#), lanes 4 to 9, white and orange arrows, respectively),  
157 the *DvSSJ1* probe only hybridized with the slowly migrating band of the ELVd-DvSSJ1  
158 samples ([Figure 1\(c\)](#), lanes 7 to 9, orange arrow). These results indicate that this slowly  
159 migrating band corresponds to a composite RNA species consisting of ELVd and *DvSSJ1*  
160 moieties. To determine whether this RNA species was linear or circular, we separated an RNA  
161 preparation from bacteria co-transformed with p15LtRnlSm and pLELVd-DvSSJ1 using  
162 denaturing 2-dimension (2D) PAGE, under conditions of high ionic strength ([Figure 1\(d\)](#)) and  
163 then low ionic strength. In this electrophoretic separation, circular RNAs are selectively delayed  
164 when conditions change from high to low ionic strength; they deviate from the diagonal of the  
165 linear RNAs. We observed the electrophoretic behavior of a circular RNA for the prominent  
166 slowly migrating species when, after the second run, the gel was either stained with ethidium  
167 bromide ([Figure 1\(e\)](#), orange arrow) or hybridized with the *DvSSJ1* probe ([Figure 1\(f\)](#), orange  
168 arrow). Hybridization spots in the diagonal of linear molecules must correspond to linear  
169 counterparts of the ELVd-DvSSJ1 RNA circular form ([Figure 1\(f\)](#)).

170 We also sought to determine the nature of the rapidly migrating prominent band in the  
171 ELVd-DvSSJ1 samples (Figure 1(a), lanes 7 to 9, black arrow). An RNA preparation from *E.*  
172 *coli* co-transformed with pLtRnlSm and pLELVd-DvSSJ1 was separated via denaturing PAGE  
173 (Figure 2(a)) and hybridized with a probe complementary to the *T. thermophila* 26S rRNA  
174 group-I intron. The probe specifically recognized this rapidly migrating species in the ELVd-  
175 DvSSJ1 RNA preparation (Figure 2(b), black arrow), indicating that this band corresponds to  
176 the spliced intron that also accumulates to a high concentration in *E. coli*. The electrophoretic  
177 mobility of this species (close to the 400-nt RNA marker) suggests a linear form. The full size  
178 of the spliced *T. thermophila* 26S rRNA intron is 413 nt. We were surprised that we did not  
179 obtain hybridization bands corresponding to unspliced forms of the intron. This suggests an  
180 extremely efficient self-splicing reaction in *E. coli* cells. To investigate the efficiency of intron  
181 splicing *in vivo*, we sampled a liquid *E. coli* culture at several time points and analyzed bacterial  
182 RNA by electrophoretic separation and northern blot hybridization with the *DvSSJ1* and the  
183 intron probes (Figure 2(c)). Time-course analysis definitively supported a highly efficient self-  
184 splicing reaction of the *T. thermophila* intron in *E. coli*. No substantial amounts of processing  
185 intermediates were detected at any time point. A deletion analysis of the flanking 10-nt exon  
186 fragments suggested that their size could also be reduced with no substantial effect on self-  
187 cleavage (Supplemental Figure S2).

188 These results indicate that, while the *T. thermophila* cDNA serves to stabilize the  
189 inverted repeats in the *E. coli* expression plasmids, the intron very efficiently self-splices from  
190 the primary transcript in bacterial cells, facilitating the accumulation of a circular RNA product  
191 that consists of an ELVd scaffold from which the *DvSSJ1*-derived 83-bp hairpin RNA is  
192 presented. The entire process is schematized in Figure 3.

193

### 194 ***The ELVd-DvSSJ1 RNA produced in E. coli possesses insecticide activity against WCR*** 195 ***larvae***

196

197 To test whether the chimeric ELVd-DvSSJ1 RNA displays anti-WCR activity, we performed a  
198 bioassay with WCR larvae. First, we grew 250-ml cultures of *E. coli* co-transformed with  
199 p15LtRnlSm and either pLELVd or pLELVd-DvSSJ1. The cells were harvested at 24 h and  
200 total bacterial RNA was purified. Our electrophoresis dilution analysis, along with a  
201 comparison to standards of known concentration, allowed us to quantify the concentration of  
202 empty ELVd and ELVd-DvSSJ1 in both RNA preparations (Supplemental Figure S3). As a  
203 control for this assay, we also produced the same *DvSSJ1*-derived 83-bp dsRNA that is

204 contained in ELVd-DvSSJ1, using conventional *in vitro* transcription and hybridization [28].  
205 Next, equivalent amounts of the three RNA preparations were mixed with the artificial  
206 rootworm diet. While empty ELVd had no effect on larval growth at the top dose of 35 ng/ $\mu$ l,  
207 ELVd-DvSSJ1 and *in vitro*-transcribed *DvSSJ1* induced similar larval growth inhibition (50%  
208 inhibition concentration,  $IC_{50} = 0.159$  vs.  $0.215$  ng/ $\mu$ l) and mortality (50% lethal concentration,  
209  $LC_{50} = 0.642$  vs.  $0.665$  ng/ $\mu$ l) (Table 1).

210

### 211 *Production of a circular version of the dsRNA of interest without the viroid scaffold using a* 212 *permuted intron*

213

214 Because carrying a sequence derived from an infectious agent may not be desirable for the  
215 commercial use of recombinant RNAs, we next aimed to automatically remove, *in vivo*, the  
216 viroid scaffold moiety from the dsRNA product. For this purpose, we inserted into our construct  
217 an additional copy of the *T. thermophila* group-I autocatalytic intron, albeit with permuted  
218 intron-exon (PIE) sequences [35]. More specifically, we incorporated cDNAs corresponding to  
219 the 3' half of the *T. thermophila* intron (from position C236 in the intron to C10 of exon 2) just  
220 between the end of the 5' ELVd moiety and the sense copy of the inverted repeat; between the  
221 antisense copy of the inverted repeat and the start of the 3' ELVd moiety, we inserted the 5'  
222 half of the *T. thermophila* intron (from -10A of exon 1 up to intron U235), as depicted in Figure  
223 4. The two intron halves were still able to recognize the intron-exon boundaries and undergo  
224 the two transesterification reactions. Because the 3' end of the second exon is covalently linked  
225 to the 5' end of the first exon, both exons and the sequence between them are released as a  
226 circular RNA molecule [35].

227 The two intron halves were amplified by PCR and inserted into the right places by the  
228 Gibson assembly reaction to build plasmid pLELVdPIE-DvSSJ1 (Supplemental Dataset S1).  
229 We co-electroporated the *E. coli* RNase III-deficient strain containing this new plasmid together  
230 with p15LtRnlSm, the plasmid to express eggplant tRNA ligase. Following plate selection of  
231 transformed clones, four independent colonies were grown in TB media for 24 h. Total bacterial  
232 RNA was extracted using phenol:chloroform and analyzed using denaturing PAGE. The  
233 controls included bacteria co-electroporated with p15LtRnlSm and either the empty ELVd  
234 plasmid (pLELVd) or pLELVd-DvSSJ1. Electrophoretic analysis of RNA preparations from  
235 bacteria transformed with pLELVdPIE-DvSSJ1 showed a new prominent band between the  
236 100-nt and 200-nt RNA markers, which was absent in both controls (Figure 5(a), compare lanes  
237 9 to 12, see blue arrow, with lanes 1 to 8). Surprisingly, the RNA molecule producing this band

238 exhibited a differential migration depending on the position in the gel, creating an inverted  
239 smile pattern ([Figure 5\(a\)](#), lanes 9 to 12, blue arrow). This anomalous electrophoretic behavior  
240 is expected for a very compact circular dsRNA molecule, whose denaturation degree, and  
241 consequent electrophoretic mobility, changes with temperature. In this kind of electrophoresis,  
242 the temperature in the center of the gel is higher than at the sides, as is the degree of  
243 denaturation. Consequently, a compact circular dsRNA migrates at the side of the gel (less  
244 denaturing) more rapidly than it does at the center (more denaturing) ([Supplemental Figure S4](#)).

245 To further confirm the circularity of the recombinant dsRNA product, we subjected  
246 equivalent aliquots of RNA preparations from bacteria transformed with pLELVd and  
247 pLELVdPIE-DvSSJ1 to 2D PAGE separation. First, we separated the RNA using PAGE under  
248 non-denaturing conditions. We detected a prominent band close to the 200-bp DNA marker in  
249 the pLELVdPIE-DvSSJ1 sample; this was also present in the pLELVd control ([Figure 5\(b\)](#),  
250 compare lanes 1 and lane 3). However, when we split both bands, directly loaded them side-  
251 by-side on top of a second denaturing polyacrylamide gel (containing 8 M urea), and continued  
252 electrophoresis, we observed a differential band corresponding to a species with a delayed  
253 electrophoretic mobility. This arose exclusively in the half lane corresponding to ELVdPIE-  
254 DvSSJ1 ([Figure 5\(b\)](#), lane 4, blue arrow). These results indicate that, in bacteria transformed  
255 with pLELVdPIE-DvSSJ1, both introns (the regular and the permuted) self-splice efficiently to  
256 form a circular dsRNA product in which the ELVd scaffold has been removed, as depicted in  
257 the scheme in [Figure 4](#).

258

### 259 *Circular dsRNA is also produced in E. coli in the absence of eggplant tRNA ligase*

260

261 Since the viroid scaffold is very effectively removed *in vivo* by the self-catalytic reactions of  
262 both introns, we examined whether the eggplant tRNA ligase added any benefit to the process.  
263 We grew cultures of bacteria co-transformed with pLELVdPIE-DvSSJ1 and either  
264 p15LtRnlSm or the corresponding empty plasmid (p15CAT; [Supplemental Dataset S1](#)).  
265 Electrophoretic analysis of the RNA preparations showed that the recombinant circular dsRNA  
266 was produced in the presence or absence of the eggplant tRNA ligase ([Figure 6\(a\)](#), see blue  
267 arrow and compare lanes 1 to 3 with lanes 4 to 6).

268 Since this result demonstrated that the tRNA ligase was no longer required to produce  
269 the recombinant circular dsRNA, we wondered whether the ELVd scaffold itself was required.  
270 To investigate this, we constructed a new plasmid in which the two ELVd moieties were deleted  
271 (pLPIE-DvSSJ1; [Supplemental Dataset S1](#)). The RNase-III-deficient *E. coli* strain was



272 transformed with this plasmid alone and the RNA was purified from bacteria growing in a liquid  
273 culture. Electrophoretic analysis showed that, under these new conditions with the two introns,  
274 deletion of the ELVd scaffold had only a minor effect on circular dsRNA production ([Figure](#)  
275 [6\(b\)](#), blue arrow; and [Supplemental Figure S5](#)).

276

## 277 **Discussion**

278

279 RNAi can be driven by endogenous or exogenous RNA molecules that are processed in  
280 eukaryotic cells by RNase-III-type enzymes (Dicer), resulting in small double-stranded  
281 molecules from 21 to 25 bp with two protruding nucleotides at each 3' end. One of the strands  
282 is loaded by an Argonaute protein to form the RNA-induced silencing complex (RISC), which  
283 serves as a guide for searching RNA targets based on base complementarity. Target RNAs can  
284 be processed in various ways, but the whole mechanism typically results in reduced gene  
285 expression [36]. Due to its mechanistic simplicity, RNAi has become a powerful tool for basic  
286 research and biotechnological applications. While transgenic technologies may be ideal for  
287 inducing RNAi, stringent legislation regarding genetically modified organisms makes it  
288 necessary to consider exogenously supplied RNA molecules in many instances. However,  
289 possibly due to its intrinsically low half-life, there is no easy way to produce the large amounts  
290 of recombinant RNAs that are required for many practical applications, although substantial  
291 advances in RNA expression have been made using stable RNA scaffolds in *E. coli* [8,37,38].  
292 We have recently contributed to this effort with a system that expresses the RNA of interest in  
293 *E. coli* in a circular form that is grafted into an extremely stable scaffold consisting of a viroid  
294 RNA backbone [18]. Viroids are plant infectious agents constituted by a relatively small naked  
295 circular RNA able to survive and replicate in the hostile environment of the host cell. The  
296 circular, highly base-paired viroid structure—likely bound to the co-expressed tRNA ligase—  
297 provides the recombinant RNA with high stability and exonuclease resistance, contributing to  
298 the vast accumulation (tens of milligrams per liter of *E. coli* culture in laboratory conditions) of  
299 the RNA of interest in this system. However, this system proved to be inefficient for producing  
300 the long dsRNAs that are preferred for inducing RNAi in many applications [18].

301 In this work, we aimed to adapt the viroid-based system for producing recombinant  
302 RNA in *E. coli* to generate the dsRNAs that are used for RNAi-based pest control. As a target,  
303 we chose *D. virgifera*, a relevant corn pest for which RNAi-based control has been recently  
304 demonstrated by targeting the *DvSSJI* gene [28–30]. To express a dsRNA homologous to a  
305 fragment of the *DvSSJI* gene in the viroid-based system, we had to create a long inverted repeat

306 in the sequence of the vector. This resulted in the longstanding and well-known problem of  
307 plasmid instability [14]. The use of asymmetric inverted repeats [9,11], or the insertion of long  
308 spacers between the repeats [10,12], has been proposed to avoid plasmid instability in bacteria.  
309 However, in other systems such as plants or *Drosophila melanogaster*, the repeats have been  
310 successfully separated with intron cDNAs from genes (of the same or related organisms)  
311 containing short fragments of both flanking exons. In this way, once transcribed, the introns are  
312 recognized and processed by the splicing machinery, eliminating them from the final product:  
313 a hairpin consisting of a long dsRNA capped by a short loop resulting from the flanking exon  
314 fragments [31,39–41]. Inspired by these studies, we separated the inverted repeats with the  
315 sequence corresponding to a self-splicing group-I intron from *T. thermophila*. Group I introns  
316 are found in genes encoding proteins, rRNA, and tRNA in algae, fungi, lichens, some lower  
317 eukaryotes, and especially in bacteria. These introns are ribozymes, capable of catalyzing their  
318 own splicing from primary transcripts without the involvement of any protein or additional  
319 factor, other than Mg<sup>2+</sup> and guanosine [42]. In addition to the full-length cDNA of the *T.*  
320 *thermophila* 26S rRNA intron (433 nt), we added each 10-nt flanking exon to ensure optimal  
321 recognition of intron-exon boundaries. As expected, the separation of the inverted repeats with  
322 the intron plus flanking exons was key to achieving plasmid stability in *E. coli* ([Supplemental](#)  
323 [Figure S1](#)). The expression of the corresponding precursor transcript in an *E. coli* RNase III-  
324 deficient strain, along with that of the eggplant tRNA ligase, led to the efficient accumulation  
325 of chimeric molecules of circular RNA consisting of the ELVd scaffold containing the 83-nt  
326 *DvSSJI* hairpin ([Figure 1](#)). Interestingly, the 433-nt processed intron also accumulated in *E.*  
327 *coli*, while unprocessed intermediates were not detected, indicating very efficient *T.*  
328 *thermophila* group-I intron self-cleavage in bacteria ([Figure 2](#)) [43]. The amount of the chimeric  
329 RNA containing the dsRNA of interest increased with time up to 24 h in the *E. coli* culture, in  
330 contrast to the usual 12-h accumulation peak of single-stranded RNA aptamers, as in Spinach  
331 [18]. The amount decreased after that point, with the band of circular RNA at 40 h being almost  
332 negligible ([Figure 2](#)). In addition, the 50-fold upscaling of production (maintaining the  
333 expression conditions) does not seem to affect the large-scale accumulation of the dsRNA of  
334 interest. Thus, we suggest that this approach is an efficient way to produce large amounts of  
335 recombinant dsRNAs, due to the fact that both the scaffolding and the hairpin loop are  
336 constructed to avoid degradation by the bacterial RNases.

337 The produced dsRNA maintains a potent anti-WCR activity, as we observed in the WCR  
338 larvae feeding bioassay ([Table 1](#)). As previously shown, the inserted RNA is fully functional,  
339 probably due to the position in which the recombinant RNA is inserted—at the end of the right

340 upper arm, thus allowing both scaffold and recombinant RNA to form two independent domains  
341 [18]. Furthermore, it should be noted that the silencing obtained with the ELVd-dsRNA chimera  
342 is slightly better than that obtained using the same dsRNA molecules produced by *in vitro*  
343 transcription (Table 1). We speculate that the presence of the protective scaffold may help  
344 increase the half-life of dsRNA during its production and application, both in the field and in  
345 the intestines and cells of insects, thereby making it available for processing by the RNAi  
346 machinery in greater quantities than the same dsRNA produced *in vitro*.

347 Various releasing methods have been described to remove the protective scaffold after  
348 expression of recombinant RNA. *In vitro* strategies such as the use of RNases [10,44] or  
349 sequence-specific DNazymes [37], although they remove single-stranded RNA, would add an  
350 additional layer to the production system. Furthermore, the resulting RNA would not be  
351 circular. Another feasible approach is to flank the recombinant RNA ends with hammerhead  
352 ribozymes, which leads to *in vivo* efficient cleavage of the RNA of interest and its release as a  
353 linear [45] or even a circular molecule [46]. In this work, we explore the use of an additional  
354 copy of the same group-I autocatalytic intron, although in a permuted fashion in which the 3'  
355 half of the intron is placed upstream of the 5' half (Figure 4). As reported, both intron halves  
356 undergo the two transesterification reactions [35], even inserting between both halves very long  
357 sequences [47] such as, in this case, the long inverted repeats plus the full-length separating  
358 intron. The resulting product is a circular molecule composed of the dsRNA locked at both  
359 sides by loops derived from the exon fragments (Figure 4). This strategy allows us to remove  
360 the viroid scaffolding without losing, in the final molecule, two key characteristics in  
361 recombinant RNA accumulation—circularity and compaction—that make the molecules highly  
362 resistant to degradation, as seen from the fact that they accumulate in large quantities in the  
363 bacteria (Figure 5). Interestingly, although there are two complete intron sequences, they are  
364 both removed correctly without mutual interference. Due to the efficient self-splicing of both  
365 introns, the circular dsRNA can be efficiently obtained in *E. coli*, even if neither the eggplant  
366 tRNA ligase nor the viroid scaffold are present (Figure 6).

367 Purified dsRNA or even inactivated complete bacterial extracts have been used to  
368 induce RNAi effectively [15,16]. For many applications, it is preferable, however, to  
369 completely isolate the dsRNA from other bacterial RNAs. Thus, both recombinant dsRNAs  
370 produced here could be purified by affinity chromatography, using recombinant-specific  
371 dsRNA-binding proteins or antibodies [48]. The circularity of the produced molecules and the  
372 absence of such structures in *E. coli* may also be exploited, as the circular molecules can be

373 purified to homogeneity by 2D-PAGE, both under denaturing conditions (with reduction of the  
374 ionic strength in the second separation) and subsequent elution from the gel.

375 In conclusion, we have developed a strategy to adapt our viroid-based expression system  
376 to overproduce in *E. coli* RNA hairpins with extended double-stranded regions able to induce  
377 RNAi in insects, as we demonstrate in the case of WCR. Further, we used a second self-splicing  
378 group-I intron (permuted) to produce very compact circular dsRNAs in which the viroid  
379 scaffold is completely removed *in vivo*. Both strategies are based on the activity of autocatalytic  
380 introns. We assert that they are fast, high-output, cost-effective, and scalable alternatives for  
381 industrially producing the large amounts of large dsRNAs that are required in pest control  
382 approaches. Because of their robustness and flexibility, these strategies could be used in any  
383 other RNAi biotechnological applications.

384

## 385 **Materials and methods**

386

### 387 *Plasmid construction*

388

389 To build pLELVd-DvSSJ1, we first produced an 83-bp cDNA molecule homologous to a  
390 fragment of *DvSSJ1* (from positions 50 through 132 of GenBank KU562965.1) via the  
391 polymerase chain reaction (PCR), using the Phusion high-fidelity DNA polymerase (Thermo  
392 Scientific) and primers D2623 and D2624. All primers used in this work are in [Supplemental](#)  
393 [Table S1](#). Next, we amplified three cDNAs corresponding to this *DvSSJ1* fragment in two  
394 opposite orientations, using primers D2625-D2626 and D2629-D2630, as well as the *T.*  
395 *thermophila* 26S rRNA intron, which includes 10 nt of the flanking exons (from positions 43  
396 through 475 of V01416.1) with primers D2627 and D2628. Finally, we assembled [49] these  
397 three cDNAs into pLELVd-BZB ([Supplemental Dataset S1](#)), digested with *BpiI* (Thermo  
398 Scientific). The sequence of the resulting plasmid, pLELVd-DvSSJ1 ([Supplemental Dataset](#)  
399 [S1](#)), was experimentally confirmed (3130xl Genetic Analyzer, Life Technologies). From this  
400 plasmid, we built pLELVdPIE-DvSSJ1 by adding, through two consecutive Gibson assembly  
401 reactions, two halves of the autocatalytic intron: 3' (opening the plasmid with the D2936 and  
402 D2937 primers) and 5' (opening the plasmid with the primers D2940 and D2941). We also  
403 sequentially removed the 5' and 3' viroid moieties from this latter plasmid via PCR with the  
404 phosphorylated primers (T4 polynucleotide kinase, Thermo Scientific) D3606 and D3285, and  
405 D3607 and D3608, followed by self-ligation of the products (T4 DNA ligase, Thermo  
406 Scientific). Finally, we obtained plasmid pLPIE-DvSSJ1 ([Supplemental Dataset S1](#)).

407

## 408 ***Escherichia coli* culture**

409

410 The strain HT115(DE3) [15] of *E. coli* was co-electroporated (Eporator, Eppendorf) with  
411 p15LtRnlSm along with pLPP, pLELVd, pLELVd-DvSSJ1, pLELVdPIE-DvSSJ1, or pLPIE-  
412 DvSSJ1. In some experiments, bacteria were electroporated only with pLELVdPIE-DvSSJ1 or  
413 pLPIE-DvSSJ1. Transformed clones were selected at 37°C in plates of Luria-Bertani (LB) solid  
414 medium (10 g/l tryptone, 5 g/l yeast extract, 10 g/l NaCl, and 1.5% agar) that included the  
415 appropriate antibiotics (50 µg/ml ampicillin and 34 µg/ml chloramphenicol, when needed).  
416 Liquid cultures of *E. coli* were grown in TB medium (12 g/l tryptone, 24 g/l yeast extract, 0.4%  
417 glycerol, 0.17 M KH<sub>2</sub>PO<sub>4</sub>, and 0.72 M K<sub>2</sub>HPO<sub>4</sub>), which also contained the appropriate  
418 antibiotics (as above), at 37°C with vigorous shaking (225 revolutions per min; rpm).

419

## 420 ***RNA extraction***

421

422 At the desired time, 2-ml aliquots of the liquid cultures were harvested; the cells were  
423 sedimented by centrifugation at 13,000 rpm for 2 min. Cells were resuspended in 50 µl of TE  
424 buffer (10 mM Tris-HCl, pH 8.0 and 1 mM EDTA). One volume (50 µl) of a 1:1 (v/v) mix of  
425 phenol (saturated with water and equilibrated at pH 8.0 with Tris-HCl, pH 8.0) and chloroform  
426 was added; the cells were broken by vigorous vortexing. The mix was centrifuged for 5 min at  
427 13,000 rpm; the aqueous phase, containing total bacterial RNA, was recovered. For large-scale  
428 preparation of ELVd and ELVd-DvSSJ1 RNA, *E. coli* were grown in a 2-l Erlenmeyer flask  
429 with 250 ml of TB medium at 37°C and 225 rpm for 24 h. Cells were sedimented by  
430 centrifugation for 15 min at 8000 rpm, resuspended in H<sub>2</sub>O, and sedimented again under the  
431 same conditions. Cells were resuspended in 10 ml buffer 50 mM Tris-HCl, pH 6.5, 0.15 M  
432 NaCl, and 0.2 mM EDTA. One volume of a 1:1 mix of phenol and chloroform was added; the  
433 mix was intensively vortexed. The phases were separated by centrifugation; the aqueous phase,  
434 once recovered, was re-extracted with one volume of chloroform. Finally, RNAs were  
435 precipitated from the aqueous phase adding sodium acetate pH 5.5 to 0.3 M and 2.5 volumes  
436 of ethanol. RNAs were resuspended in H<sub>2</sub>O and re-precipitated with one volume of isopropanol.

437

## 438 ***RNA electrophoresis***

439

440 Aliquots of the RNA preparations (20  $\mu$ l; corresponding to 0.8 ml of the original *E. coli* culture)  
441 were mixed with one volume of loading buffer (98% formamide, 10 mM Tris-HCl, pH 8.0, 1  
442 mM EDTA, 0.0025% bromophenol blue, and 0.0025% xylene cyanol), denatured (1.5 min at  
443 95°C followed by snap cooling on ice), and separated by denaturing PAGE. The Riboruler low  
444 range RNA ladder (Thermo Scientific) was used as a standard. Gels were run for 2 h at 200 V  
445 in 140  $\times$  130  $\times$  2 mm, 5% polyacrylamide gels (37.5:1 acrylamide:N,N'-  
446 methylenebisacrylamide) in TBE buffer (89 mM Tris, 89 mM boric acid, 2 mM EDTA) that  
447 included 8 M urea. The electrophoresis buffer was TBE without urea. The gels were stained by  
448 shaking for 15 min in 200 ml of 1  $\mu$ g/ml ethidium bromide. After being washed three times  
449 with water, the gels were photographed under UV light (UVIDoc-HD2/20MX, UVITEC). In  
450 one experiment, an RNA preparation was separated by denaturing electrophoresis in a second  
451 dimension at a lower (0.25 $\times$  TBE) ionic strength. After the first dimension, an entire lane from  
452 a 5% polyacrylamide, 8 M urea, TBE gel was cut and laid transversely on top of a 5%  
453 polyacrylamide gel of the same dimensions in 0.25 $\times$  TBE buffer containing 8 M urea; it was  
454 run for 2.5 h at 25 mA. We set an upper limit of 25 mA. In another experiment, the RNA was  
455 separated first in a non-denaturing 5% PAGE gel in TAE buffer (40 mM Tris, 20 mM sodium  
456 acetate, 1 mM EDTA, pH 7.2) without urea. The gel was run for 1.5 h at 75 mA. The bands of  
457 interest were cut after the electrophoresis separation and placed on top of a 5% PAGE gel in  
458 0.25 $\times$  TBE buffer containing 8 M urea; they were run as previously explained.

459

#### 460 *Northern blot hybridization analysis of RNA*

461

462 After electrophoretic separation, RNAs were electroblotted to positively charged nylon  
463 membranes (Nytran SPC, Whatman) and cross-linked by irradiation via 1.2 J/cm<sup>2</sup> UV light (254  
464 nm, Vilber Lourmat). Hybridization was performed overnight at 70°C in 50% formamide, 0.1%  
465 Ficoll, 0.1% polyvinylpyrrolidone, 100 ng/ml salmon sperm DNA, 1% sodium dodecyl sulfate  
466 (SDS), 0.75 M NaCl, 75 mM sodium citrate, pH 7.0, with approximately 1 million counts per  
467 minute of <sup>32</sup>P-labelled RNA probe. Hybridized membranes were washed three times for 10 min  
468 with 2 $\times$  SSC, 0.1% SDS at room temperature; they were washed again for 15 min at 55°C with  
469 0.1 $\times$  SSC, 0.1% SDS. SSC buffer is 150 mM NaCl, 15 mM sodium citrate, pH 7.0. The results  
470 were registered by autoradiography using X-ray films (Fujifilm). Radioactive RNA probes  
471 complementary to ELVd, the *DvSSJ1* fragment, and the *T. thermophila* intron E were obtained  
472 by *in vitro* transcription of the corresponding linearized plasmids with 20 U of T3 bacteriophage  
473 RNA polymerase (Roche) in 20- $\mu$ l reactions containing 40 mM Tris-HCl, pH 8.0, 6 mM MgCl<sub>2</sub>,

474 20 mM DTT, 2 mM spermidine, 0.5 mM each of ATP, CTP, and GTP, and 50  $\mu$ Ci of [ $\alpha$ -  
475  $^{32}$ P]UTP (800 Ci/mmol), 20 U RNase inhibitor (RiboLock, Thermo Scientific), and 0.1 U yeast  
476 inorganic pyrophosphatase (Thermo Scientific). The reactions were incubated for 1 h at 37 °C.  
477 After transcription, the DNA template was digested with 20 U DNase I (Thermo Scientific) for  
478 10 min at 37°C; the probe was purified by chromatography using a Sephadex G-50 column  
479 (mini Quick Spin DNA Columns, Roche).

480

### 481 ***Double-stranded RNA production by in vitro transcription***

482

483 The target-specific primers containing T7 RNA polymerase sites at the 5' end of each primer  
484 were used to generate the PCR product; this served as the template for dsRNA synthesis by *in*  
485 *vitro* transcription using a MEGAscript kit (Life Technologies). The dsRNAs were purified  
486 using the Megaclear kit (Life Technologies) and examined by 12-well E-gel electrophoresis  
487 (Life Technologies) to ensure dsRNA integrity. They were quantified using Phoretix 1D  
488 (Cleaver Scientific) or a NanoDrop 8000 Spectrophotometer (Thermo Scientific).

489

### 490 ***WCR bioassays***

491

492 We prepared the WCR diet according to the manufacturer's guideline for a *D. virgifera* diet  
493 (Frontier, Newark, DE), with modifications [50]. The dsRNA samples (5  $\mu$ l) were incorporated  
494 into 25  $\mu$ l of WCR diet in a 96-well microtiter plate and shaken on an orbital shaker for 1 min  
495 until the diet solidified. For each RNA sample, nine doses (35, 17.5, 8.8, 4.4, 2.2, 1.09, 0.55,  
496 0.27, and 0.14 ng/ $\mu$ l) were evaluated, for a total of 32 observations per dose or water control.  
497 We transferred two one-day-old larvae into each well. The plates were incubated at 27°C and  
498 65% relative humidity. Seven days after exposure, the larvae were scored for growth inhibition  
499 (severely stunted larvae with >60% reduction in size) and mortality. We analyzed the data using  
500 PROC Probit analysis in SAS [51] to determine LC<sub>50</sub>. The total numbers of dead and severely  
501 stunted larvae were used to analyze the IC<sub>50</sub>.

502

### 503 ***Disclosure statement***

504

505 No potential conflict of interest was reported by the authors.

506

### 507 ***Funding***

508

509 This work was supported by the Ministerio de Ciencia e Innovación (Spain) through the  
510 Agencia Estatal de Investigación (grants BIO2017-83184-R and BIO2017-91865-EXP; co-  
511 financed by the European Region Development Fund). B.O. is the recipient of a predoctoral  
512 contract from Universitat Politècnica de València (PAID-01-17).

513

514 **ORCID**

515

516 Beltrán Ortolá: <http://orcid.org/0000-0002-3144-1015>

517 Xu Hu: <http://orcid.org/0000-0002-1372-5399>

518 José-Antonio Daròs: <http://orcid.org/0000-0002-6535-2889>

519

## 520 **References**

521

- 522 1. Fire A, Xu S, Montgomery MK, Kostas SA, Driver SE, Mello CC. Potent and specific  
523 genetic interference by double-stranded RNA in *Caenorhabditis elegans*. *Nature*. 1998;  
524 391:806–11.
- 525 2. Setten RL, Rossi JJ, Han S ping. The current state and future directions of RNAi-based  
526 therapeutics. *Nat. Rev. Drug Discov*. 2019; 18:421–46.
- 527 3. Guo Q, Liu Q, A. Smith N, Liang G, Wang M-B. RNA Silencing in Plants:  
528 Mechanisms, Technologies and Applications in Horticultural Crops. *Curr Genomics*  
529 2016; 17:476–89.
- 530 4. Liu S, Jaouannet M, Dempsey DA, Imani J, Coustau C, Kogel KH. RNA-based  
531 technologies for insect control in plant production. *Biotechnol Adv*. 2020; 39:107463.
- 532 5. Fletcher SJ, Reeves PT, Hoang BT, Mitter N. A Perspective on RNAi-Based  
533 Biopesticides. *Front Plant Sci*. 2020; 11.
- 534 6. Das PR, Sherif SM. Application of Exogenous dsRNAs-induced RNAi in Agriculture:  
535 Challenges and Triumphs. *Front Plant Sci*. 2020; 11:946.
- 536 7. Cagliari D, Dias NP, Galdeano DM, dos Santos EÁ, Smagghe G, Zotti MJ.  
537 Management of Pest Insects and Plant Diseases by Non-Transformative RNAi. *Front*.  
538 *Plant Sci*. 2019; 10:1319.
- 539 8. Ponchon L, Dardel F. Recombinant RNA technology: the tRNA scaffold. *Nat Methods*.  
540 2007; 4:571–6.
- 541 9. Saksmerprome V, Charoonart P, Gangnonngiw W, Withyachumnarnkul B. A novel



- 542 and inexpensive application of RNAi technology to protect shrimp from viral disease. *J*  
543 *Virol Methods*. 2009; 162:213–7.
- 544 10. Posiri P, Ongvarrasopone C, Panyim S. A simple one-step method for producing  
545 dsRNA from *E. coli* to inhibit shrimp virus replication. *J Virol Methods*. 2013; 188:64–  
546 9.
- 547 11. Thammasorn T, Sangsuriya P, Meemetta W, Senapin S, Jitrakorn S, Rattanarojpong T,  
548 Saksmerprome V. Large-scale production and antiviral efficacy of multi-target double-  
549 stranded RNA for the prevention of white spot syndrome virus (WSSV) in shrimp.  
550 *BMC Biotechnol*. 2015; 15:110.
- 551 12. Zhong C, Smith NA, Zhang D, Goodfellow S, Zhang R, Shan W, Wang MB. Full-  
552 length hairpin RNA accumulates at high levels in yeast but not in bacteria and plants.  
553 *Genes (Basel)*. 2019; 10:458.
- 554 13. Leach DRF. Long DNA palindromes, cruciform structures, genetic instability and  
555 secondary structure repair. *BioEssays*. 1994; 16:893–900.
- 556 14. Lai PJ, Lim CT, Le HP, Katayama T, Leach DRF, Furukohri A, Maki H. Long inverted  
557 repeat transiently stalls DNA replication by forming hairpin structures on both leading  
558 and lagging strands. *Genes to Cells*. 2016; 21:136–45.
- 559 15. Timmons L, Court DL, Fire A. Ingestion of bacterially expressed dsRNAs can produce  
560 specific and potent genetic interference in *Caenorhabditis elegans*. *Gene*. 2001;  
561 263:103–12.
- 562 16. Israni B, Rajam M V. Silencing of ecdysone receptor, insect intestinal mucin and  
563 sericotropin genes by bacterially produced double-stranded RNA affects larval growth  
564 and development in *Plutella xylostella* and *Helicoverpa armigera*. *Insect Mol Biol*.  
565 2017; 26:164–80.
- 566 17. Papić L, Rivas J, Toledo S, Romero J. Double-stranded RNA production and the  
567 kinetics of recombinant *Escherichia coli* HT115 in fed-batch culture. *Biotechnol*  
568 *Reports*. 2018; 20:e00292.
- 569 18. Daròs JA, Aragonés V, Cordero T. A viroid-derived system to produce large amounts  
570 of recombinant RNA in *Escherichia coli*. *Sci Rep*. 2018; 8:1904.
- 571 19. Cordero T, Aragonés V, Daròs JA. Large-scale production of recombinant RNAs on a  
572 circular scaffold using a viroid-derived system in *Escherichia coli*. *J Vis Exp*. 2018;  
573 2018:e58472.
- 574 20. Flores R, Hernández C, Martínez De Alba AE, Daròs JA, Di Serio F. Viroids and  
575 viroid-host interactions. *Annu Rev Phytopathol*. 2005; 43:117–39.

- 576 21. Darós JA. Viroids: Small noncoding infectious RNAs with the remarkable ability of  
577 autonomous replication. In: Current Research Topics in Plant Virology. Springer  
578 International Publishing; 2016. page 295–322.
- 579 22. Adkar-Purushothama CR, Perreault JP. Current overview on viroid–host interactions.  
580 Wiley Interdiscip Rev RNA. 2020; 11:e1570.
- 581 23. Darós JA. Eggplant latent viroid: a friendly experimental system in the family  
582 Avsunviroidae. Mol. Plant Pathol. 2016; 17:1170–7.
- 583 24. Nohales M-A, Molina-Serrano D, Flores R, Daros J-A. Involvement of the  
584 Chloroplastic Isoform of tRNA Ligase in the Replication of Viroids Belonging to the  
585 Family Avsunviroidae. J Virol. 2012; 86:8269–76.
- 586 25. Nohales MÁ, Flores R, Darós JA. Viroid RNA redirects host DNA ligase 1 to act as an  
587 RNA ligase. Proc Natl Acad Sci USA. 2012; 109:13805–10.
- 588 26. Yu AM, Batra N, Tu MJ, Sweeney C. Novel approaches for efficient in vivo  
589 fermentation production of noncoding RNAs. Appl Microbiol Biotechnol. 2020;  
590 104:1927–37.
- 591 27. Aragón P, Baselga A, Lobo JM. Global estimation of invasion risk zones for the  
592 western corn rootworm *Diabrotica virgifera virgifera*: integrating distribution models  
593 and physiological thresholds to assess climatic favourability. J Appl Ecol. 2010;  
594 47:1026–35.
- 595 28. Hu X, Richtman NM, Zhao JZ, Duncan KE, Niu X, Procyk LA, Oneal MA, Kernodle  
596 BM, Steimel JP, Crane VC, et al. Discovery of midgut genes for the RNA interference  
597 control of corn rootworm. Sci Rep. 2016; 6:30542.
- 598 29. Hu X, Steimel JP, Kapka-Kitzman DM, Davis-Vogel C, Richtman NM, Mathis JP,  
599 Nelson ME, Lu AL, Wu G. Molecular characterization of the insecticidal activity of  
600 double-stranded RNA targeting the smooth septate junction of western corn rootworm  
601 (*Diabrotica virgifera virgifera*). PLoS One. 2019; 14:e0210491.
- 602 30. Hu X, Boeckman CJ, Cong B, Steimel JP, Richtman NM, Sturtz K, Wang Y, Walker  
603 CL, Yin J, Unger A, et al. Characterization of DvSSJ1 transcripts targeting the smooth  
604 septate junction (SSJ) of western corn rootworm (*Diabrotica virgifera virgifera*). Sci  
605 Rep. 2020; 10:11139.
- 606 31. Smith NA, Singh SP, Wang MB, Stoutjesdijk PA, Green AG, Waterhouse PM. Total  
607 silencing by intron-spliced hairpin RNAs. Nature. 2000; 407:319–20.
- 608 32. Zaug AJ, Cech TR. The Tetrahymena intervening sequence ribonucleic acid enzyme is  
609 a phosphotransferase and an acid phosphatase. Biochemistry. 1986; 25:4478–82.

- 610 33. Fadda Z, Daròs JA, Fagoaga C, Flores R, Duran-Vila N. Eggplant Latent Viroid, the  
611 Candidate Type Species for a New Genus within the Family Avsunviroidae  
612 (Hammerhead Viroids). *J Virol.* 2003; 77:6528–32.
- 613 34. Cordero T, Ortolá B, Daròs JA. Mutational analysis of Eggplant Latent Viroid RNA  
614 circularization by the eggplant tRNA ligase in *Escherichia coli*. *Front Microbiol.* 2018;  
615 9:635.
- 616 35. Puttaraju M, Been M. Group I permuted intron-exon (PIE) sequences self-splice to  
617 produce circular exons. *Nucleic Acids Res.* 1992; 20:5357–64.
- 618 36. Baulcombe D. RNA silencing in plants. *Nature.* 2004; 431:356–63.
- 619 37. Liu Y, Stepanov VG, Strych U, Willson RC, Jackson GW, Fox GE. DNAzyme-  
620 mediated recovery of small recombinant RNAs from a 5S rRNA-derived chimera  
621 expressed in *Escherichia coli*. *BMC Biotechnol.* 2010; 10:85.
- 622 38. Ponchon L, Catala M, Seijo B, El Khouri M, Dardel F, Nonin-Lecomte S, Tisné C. Co-  
623 expression of RNA-protein complexes in *Escherichia coli* and applications to RNA  
624 biology. *Nucleic Acids Res.* 2013; 41:e150.
- 625 39. Lee YS, Carthew RW. Making a better RNAi vector for *Drosophila*: Use of intron  
626 spacers. *Methods.* 2003; 30:322–9.
- 627 40. Bao S, Cagan R. Fast cloning inverted repeats for RNA interference. *RNA.* 2006;  
628 12:2020–4.
- 629 41. Eamens AL, Waterhouse PM. Vectors and methods for hairpin RNA and artificial  
630 microRNA-mediated gene silencing in plants. *Methods Mol Biol.* 2011; 701:179–97.
- 631 42. Raghavan R, Minnick MF. Group I introns and inteins: Disparate origins but  
632 convergent parasitic strategies. *J. Bacteriol.* 2009; 191:6193–202.
- 633 43. Guo F, Cech TR. In vivo selection of better self-splicing introns in *Escherichia coli*: the  
634 role of the P1 extension helix of the *Tetrahymena* intron. *RNA.* 2002; 8:647–58.
- 635 44. Ponchon L, Beauvais G, Nonin-Lecomte S, Dardel F. Selective RNase H cleavage of  
636 target RNAs from a tRNA scaffold. *Methods Mol Biol.* 2012; 941:9–18.
- 637 45. Nelissen FHT, Leunissen EHP, van de Laar L, Tessari M, Heus HA, Wilmenga SS.  
638 Fast production of homogeneous recombinant RNA--towards large-scale production of  
639 RNA. *Nucleic Acids Res.* 2012; 40:e102.
- 640 46. Litke JL, Jaffrey SR. Highly efficient expression of circular RNA aptamers in cells  
641 using autocatalytic transcripts. *Nat Biotechnol.* 2019; 37:667–75.
- 642 47. Wesselhoeft RA, Kowalski PS, Anderson DG. Engineering circular RNA for potent  
643 and stable translation in eukaryotic cells. *Nat Commun.* 2018; 9:2629.

- 644 48. Atsumi G, Sekine KT, Kobayashi K. A new method to isolate total dsrna. *Methods Mol*  
645 *Biol.* 2015; 1236:27–37.
- 646 49. Gibson DG, Young L, Chuang RY, Venter JC, Hutchison 3rd CA, Smith HO.  
647 Enzymatic assembly of DNA molecules up to several hundred kilobases. *Nat Methods.*  
648 2009; 6:343–5.
- 649 50. Zhao JZ, Oneal MA, Richtman NM, Thompson SD, Cowart MC, Nelson ME, Pan Z,  
650 Alves AP, Yamamoto T. mCry3A-selected western corn rootworm (Coleoptera:  
651 Chrysomelidae) colony exhibits high resistance and has reduced binding of mCry3A to  
652 midgut tissue. *J Econ Entomol.* 2016; 109:1369–77.
- 653 51. Probit Analysis. *J Pharm Sci.* 1971; 60:1432.  
654

655 **Table 1.** Insecticidal activity of conventional *DvSSJ1* *in vitro*-transcribed dsRNA (IVT  
656 *DvSSJ1*) and ELVd-*DvSSJ1* dsRNA against WCR  
657

| <b>WCR</b>                | <b>LC<sub>50</sub>/IC<sub>50</sub> *</b> | <b>RNA<br/>(ng/μl)</b> | <b>Lower<br/>95% CL *</b> | <b>Upper<br/>95% CL</b> | <b>n</b> |
|---------------------------|------------------------------------------|------------------------|---------------------------|-------------------------|----------|
| <b>IVT <i>DvSSJ1</i></b>  | LC <sub>50</sub>                         | 0.665                  | 0.426                     | 0.928                   | 188      |
|                           | IC <sub>50</sub>                         | 0.215                  | 0.096                     | 0.301                   | 157      |
| <b>ELVd-<i>DvSSJ1</i></b> | LC <sub>50</sub>                         | 0.642                  | 0.384                     | 0.925                   | 188      |
|                           | IC <sub>50</sub>                         | 0.159                  | 0.028                     | 0.277                   | 124      |
| <b>Empty ELVd</b>         | LC <sub>50</sub>                         | >35 ppm                |                           |                         |          |
|                           | IC <sub>50</sub>                         | >35 ppm                |                           |                         |          |

658 \*LC<sub>50</sub>, 50% lethal concentration; IC<sub>50</sub>, 50% inhibition concentration; CL, confidence limit.  
659

660 **Figures**

661

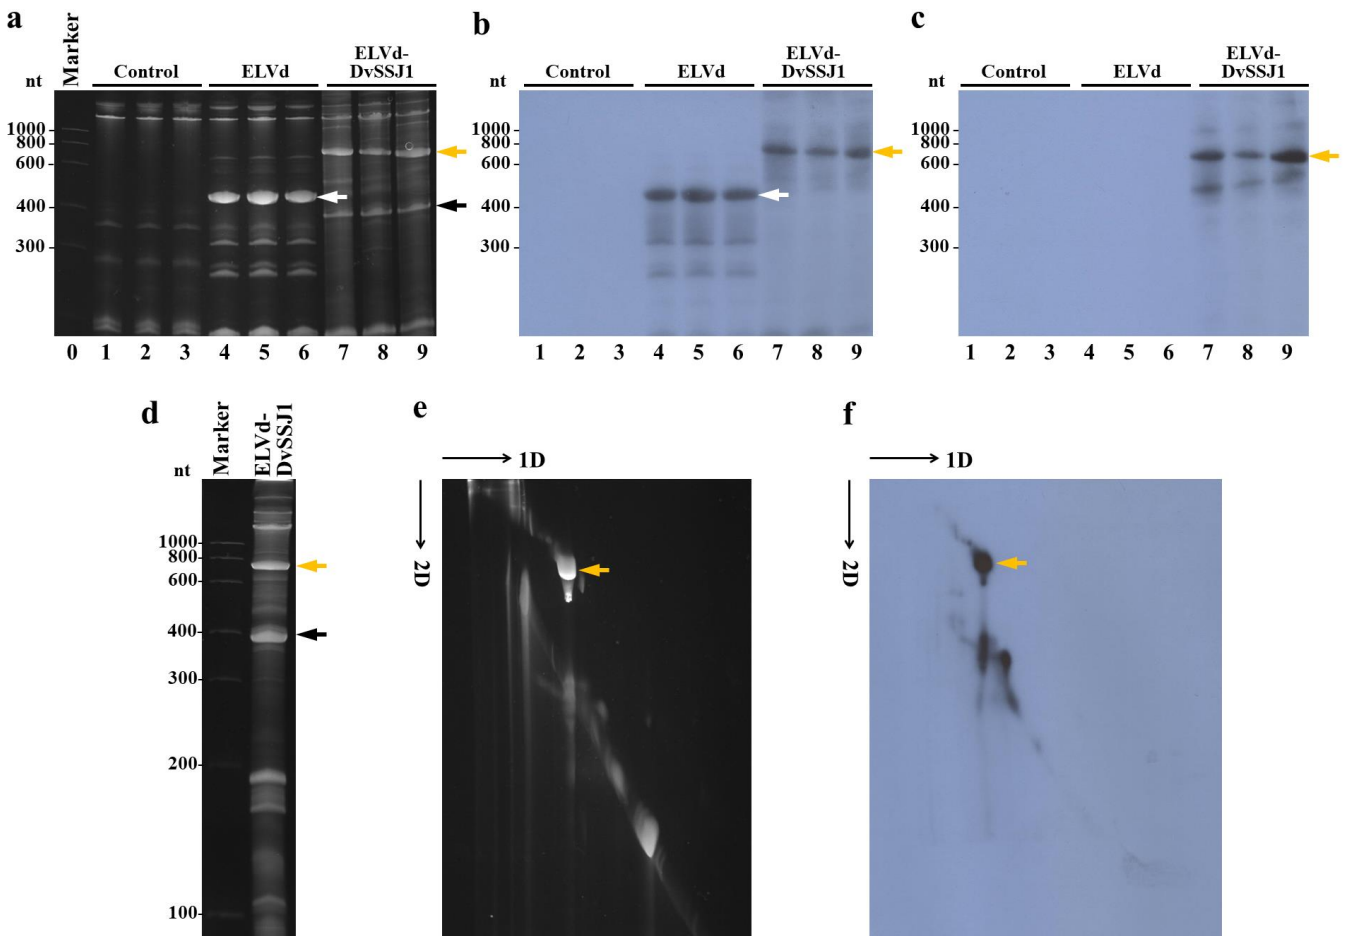

662 **Figure 1.** Analysis of *DvSSJ1*-derived dsRNA produced in *E. coli*. (a to c) Bacterial RNA  
663 was extracted from three independent cultures of *E. coli* co-transformed with p15LtRnlSm and  
664 pLPP (lanes 1 to 3), pLELVd (lanes 4 to 6) or pLELVd-DvSSJ1 (lanes 7 to 9), separated by  
665 denaturing PAGE, and stained with ethidium bromide (a) or transferred to membranes for  
666 hybridization with ELVd (b) or *DvSSJ1* (c) probes. (a) Lane 0, RNA marker with sizes in nt on  
667 the left. (d to f) An RNA preparation from *E. coli* co-transformed with p15LtRnlSm and  
668 pLELVd-DvSSJ1 was separated by denaturing 2D PAGE. The first dimension was under high  
669 ionic strength, and the RNAs were stained with ethidium bromide (d). The second dimension  
670 was under low ionic strength; the RNAs were first stained with ethidium bromide (e) and then  
671 transferred to a membrane and hybridized with a *DvSSJ1* probe (f). (e and f) Slim black arrows  
672 indicate the direction of RNA migration in both dimensions of 2D PAGE. Thick white, orange,  
673 and black arrows point to ELVd, ELVd-DvSSJ1, and spliced intron, respectively.

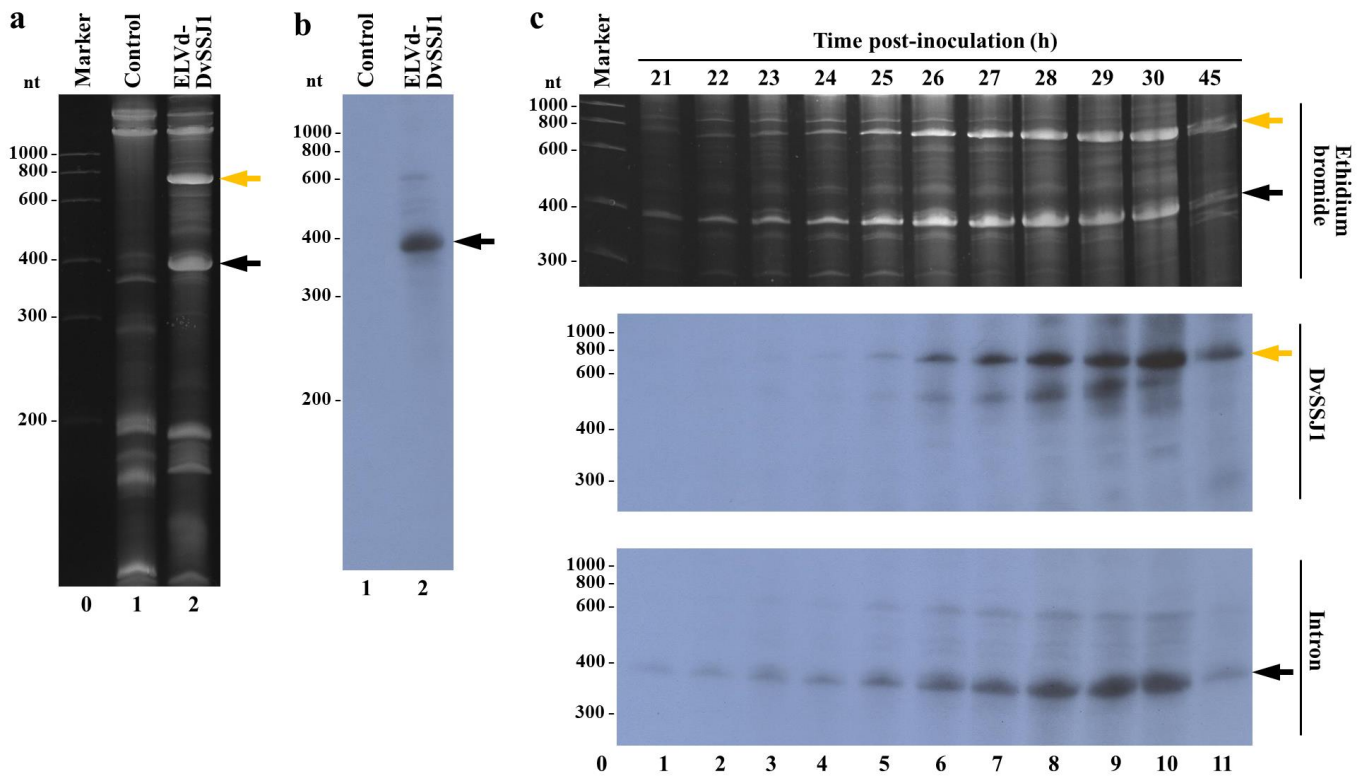

674

675 **Figure 2. Analysis of the 26S rRNA intron processing in *E. coli*.** (a and b) RNA was extracted  
676 from *E. coli* transformed with p15LtRnlSm and either pLPP (lane 1) or pLELVd-DvSSJ1 (lane  
677 2), separated by denaturing PAGE, stained with ethidium bromide (a), and then transferred to  
678 a membrane and hybridized with an intron-specific probe (b). (c) RNA was extracted from  
679 aliquots of a liquid culture of *E. coli* co-transformed with p15LtRnlSm and pLELVd-DvSSJ1  
680 at different time points (as indicated). Lanes 1 to 11, RNAs were separated by denaturing PAGE  
681 and stained with ethidium bromide (top) or transferred to a membrane and hybridized with a  
682 *DvSSJ1* (middle) or intron-specific (bottom) probe. Orange and black arrows point to ELVd-  
683 DvSSJ1 RNA and the spliced intron, respectively. (a and c) Lane 0, RNA markers with sizes in  
684 nt on the left.

685

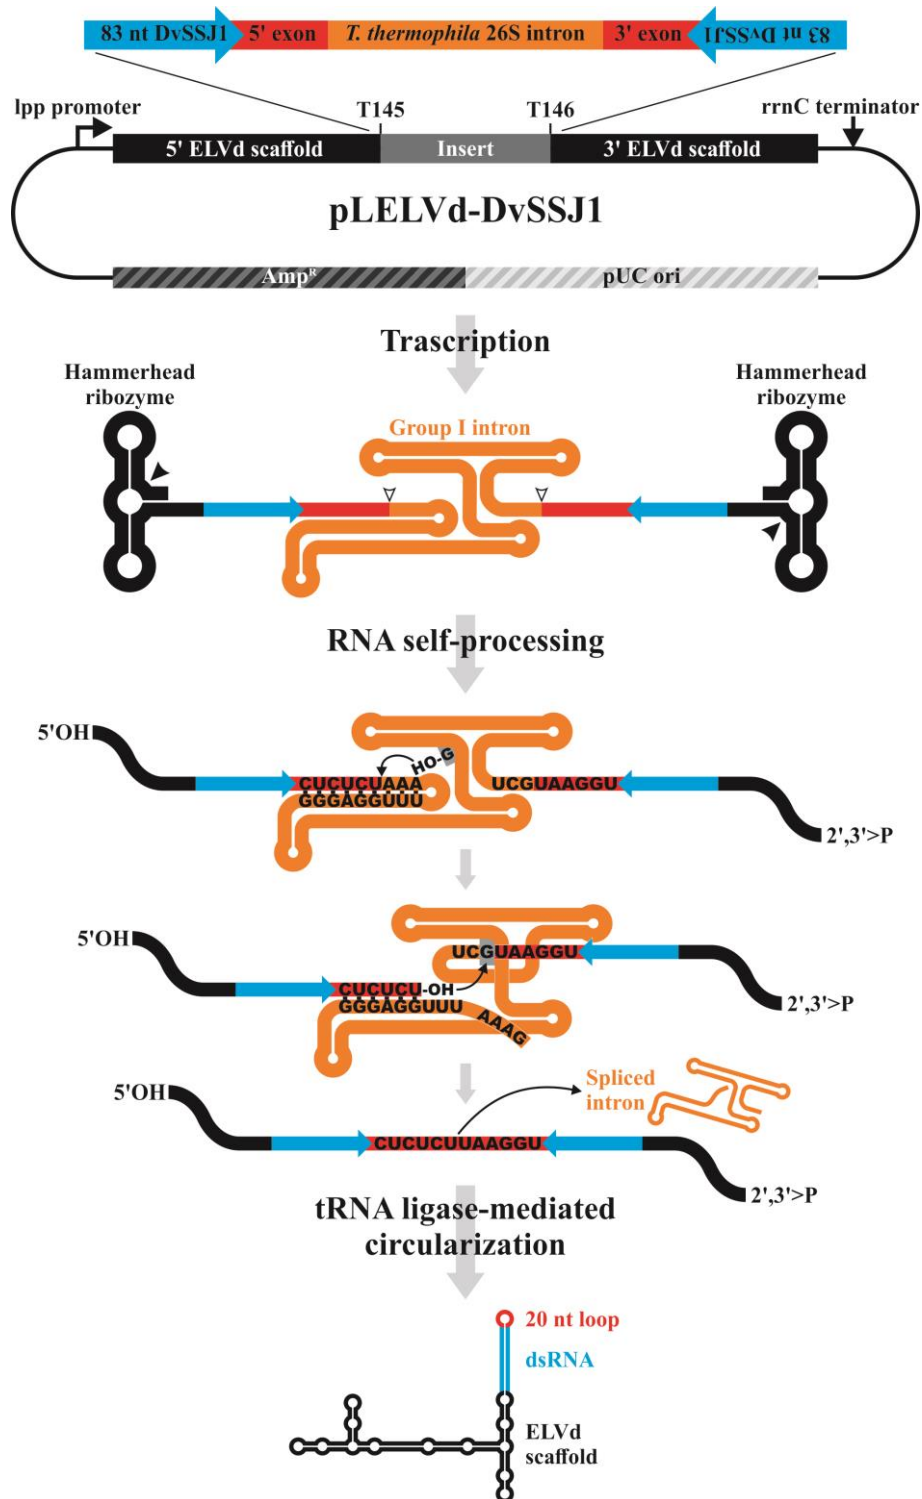

686

687 **Figure 3.** Schematic representation of the pLELVd-DvSSJ1 plasmid and the process for  
688 **producing dsRNA in *E. coli*.** In the primary transcript (not at scale), the inverted repeats  
689 homologous to *DvSSJ1* are separated by the *T. thermophila* 26S rRNA intron and the 10-nt  
690 native flanking exons. Spacing the inverted repeats in the expression plasmid is critical to  
691 stabilizing the constructs. After transcription, the intron self-splices very efficiently through  
692 two sequential transesterification reactions. First, the 3'-OH of an exogenous guanosine



693 nucleoside docked in the intron structure attacks the phosphodiester bond between the first  
694 exon-intron boundary, generating a 3'-OH group at the end of the exon and leaving the G  
695 residue attached to the 5' end of the intron. Next, the intron terminal G is docked in the same  
696 place of the intron structure and the 3'-OH group of the first exon attacks the phosphodiester  
697 bond between the second exon-intron boundary, resulting in the ligation of both exons and the  
698 release of the catalytic intron in a linear form. The intron-processing facilitates the hybridization  
699 of the inverted repeat sequences to form a hairpin composed of a dsRNA capped by a 20-nt  
700 loop arising from the two flanking exons. Concomitantly, the self-splicing activity of the two  
701 ELVd hammerhead ribozymes present in the precursor yields the 5'-hydroxyl and 2',3'-  
702 phosphodiester termini that are recognized and ligated by the co-expressed eggplant tRNA  
703 ligase, generating a circular chimera.

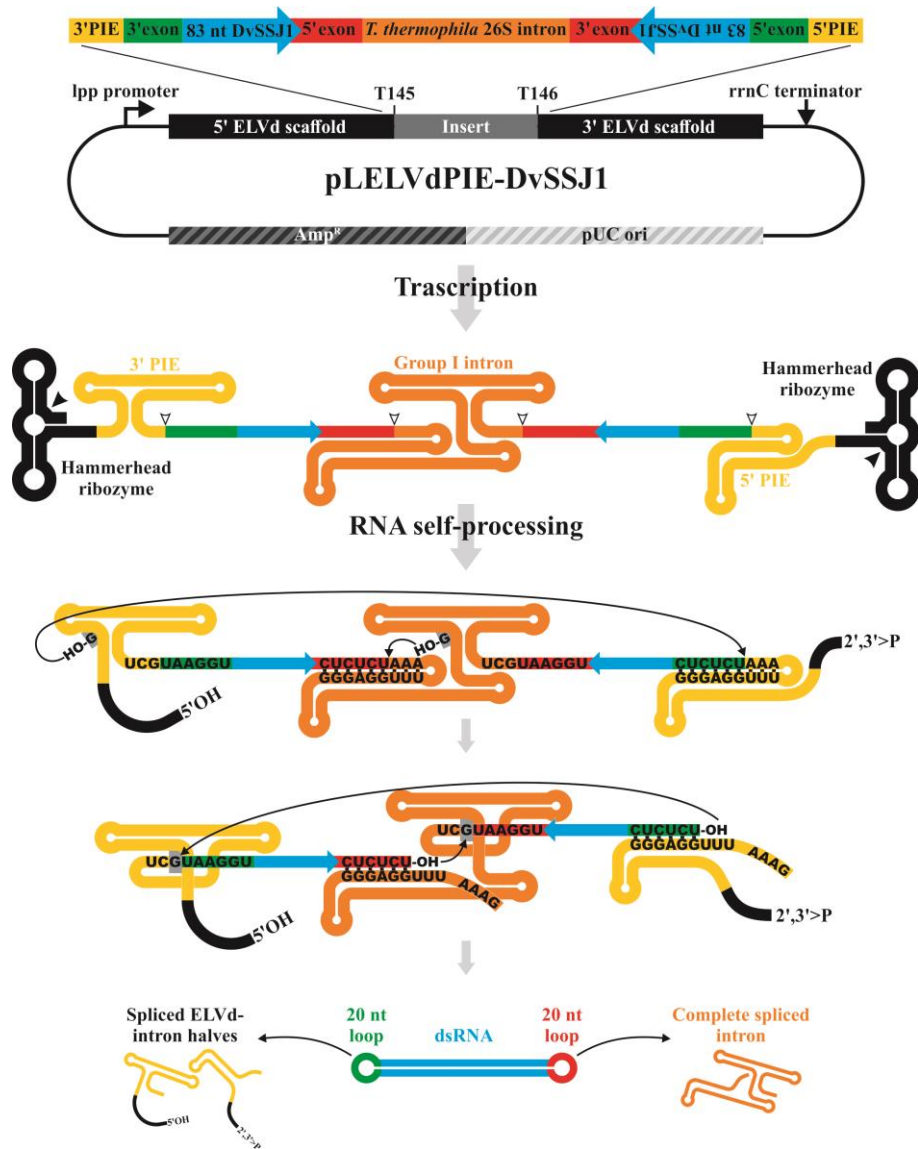

704

705 **Figure 4. Schematic representation of the double-intron strategy to produce recombinant**

706 **circular dsRNA in which the ELVd scaffold is removed.** A permuted additional copy of the

707 autocatalytic intron is added to the features of the pLELVd-DvSSJ1 flanking the inverted

708 repeats to generate pLELVdPIE-DvSSJ1 (not at scale). Two self-splicing reactions are carried

709 out in parallel (following the same two sequential transesterification reactions detailed in [Figure](#)

710 [3](#)). As a result, the complete intron is released, in addition to the two halves of the permuted

711 intron covalently linked to the 3' or 5' ELVd scaffold; a circular dsRNA molecule, consisting

712 of a 83-bp *DvSSJ1* dsRNA capped at both ends by the exon fragments is produced.

713

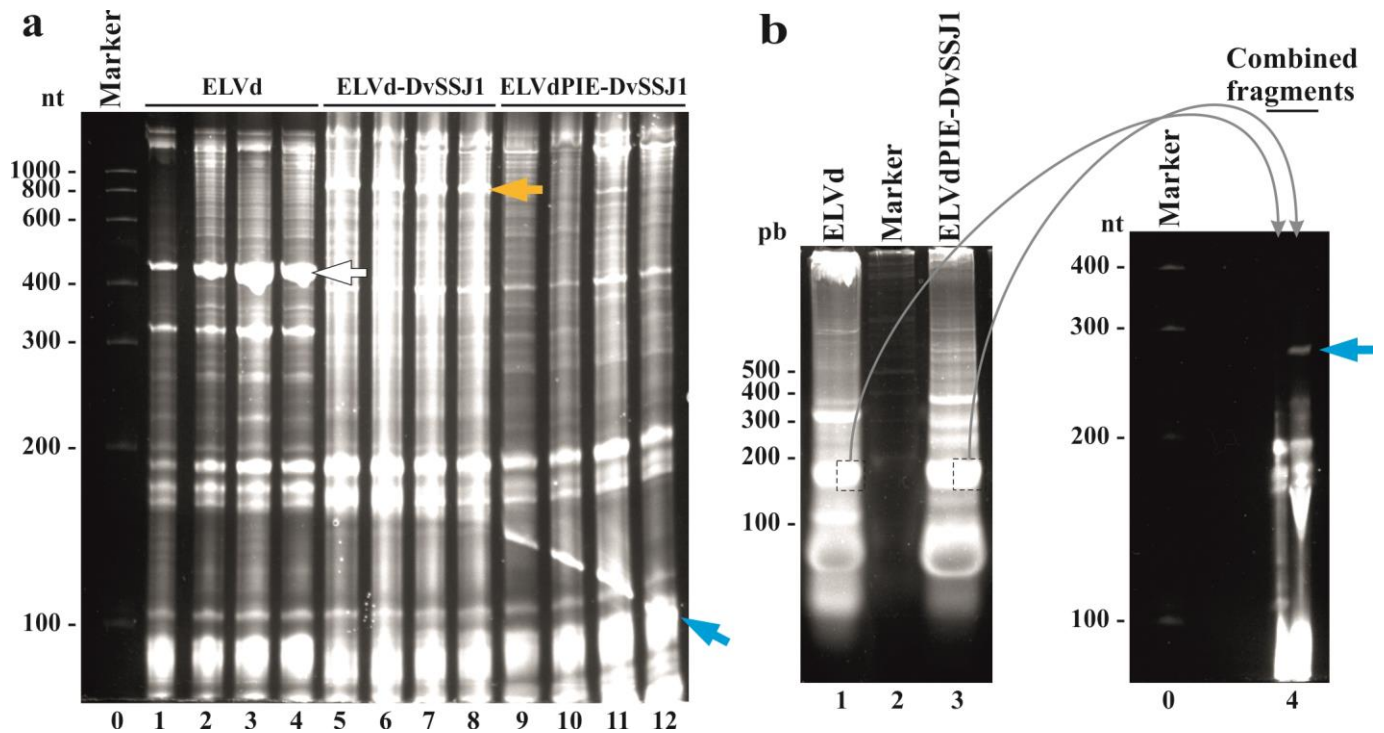

714

715 **Figure 5. Recombinant circular dsRNA production in *E. coli* with the two-intron strategy.**

716 (a) *E. coli* HT115(DE3) was co-electroporated with p15LtRnlSm along with pLELVd (lanes 1  
717 to 4), pLELVd-DvSSJ1 (lanes 5 to 8), or pLELVdPIE-DvSSJ1 (lanes 9 to 12). Bacterial RNAs  
718 were extracted from culture aliquots after 24 h and separated by denaturing PAGE. The gel was  
719 stained with ethidium bromide. (b) Equivalent aliquots of the total RNAs from *E. coli* co-  
720 transformed with p15LtRnlSm and either pLELVd (lane 1) or pLELVdPIE-DvSSJ1 (lane 3)  
721 were subjected to 2D PAGE separation. The first dimension (left) was conducted under non-  
722 denaturing conditions. Lane 2, DNA marker with sizes in bp on the left. The indicated bands  
723 were recovered from the first gel and placed together in a single well of a second denaturing  
724 gel (right; lane 4). The second dimension was done under denaturing conditions. (a and b) Lanes  
725 0, RNA marker with sizes in nt on the left. Gels were stained with ethidium bromide. White,  
726 orange, and blue arrows point to ELVd, ELVd-DvSSJ1, and the circular dsRNA, respectively.

727

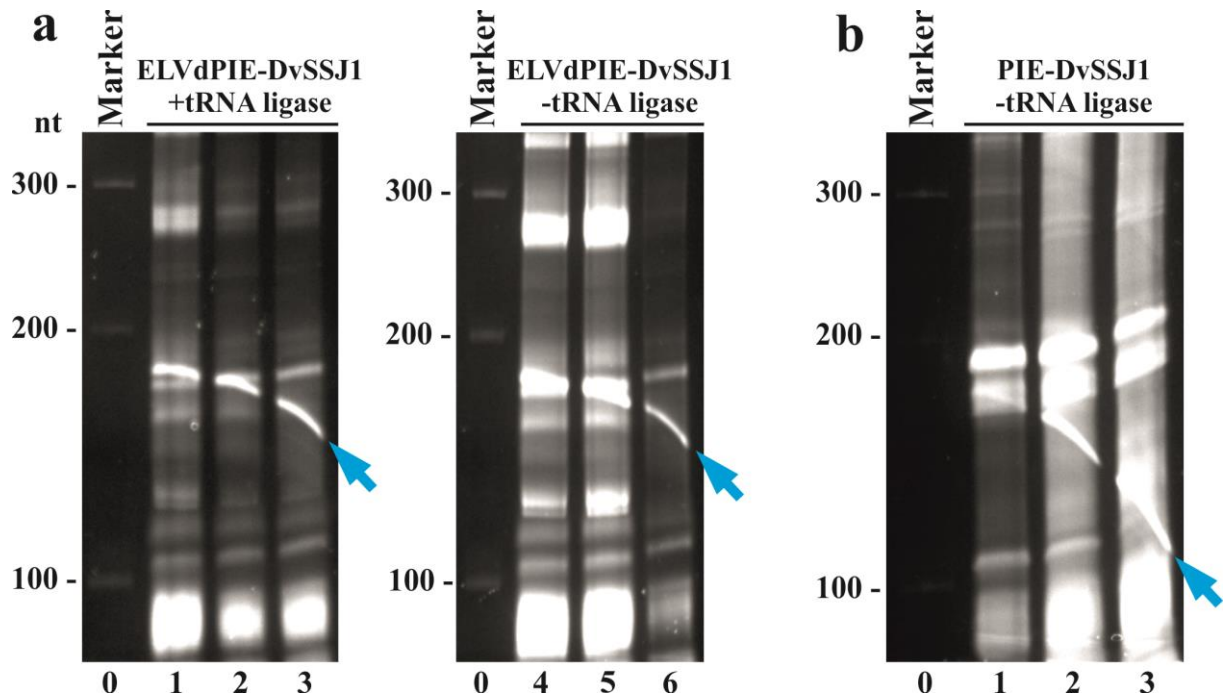

728

729 **Figure 6. Recombinant circular dsRNA production in *E. coli* without tRNA ligase and the**

730 **ELVd scaffold.** RNA preparations from (a) bacteria transformed with pLELVdPIE-DvSSJ1

731 and p15LtRnlSm (lanes 1 to 3) or the corresponding empty plasmid p15CAT (lanes 4 to 6), and

732 (b) bacteria transformed with pLPIE-DvSSJ1 and p15CAT (lanes 1 to 3) were separated by

733 denaturing PAGE and the gels were stained with ethidium bromide. Lanes 0, RNA marker with

734 sizes in nt on the left. In all cases, RNA was extracted from bacteria growing in liquid cultures

735 after 24 h. The circular dsRNA is indicated with blue arrows.

736

737  
738  
739  
740  
741  
742  
743  
744  
745  
746  
747  
748  
749  
750  
751  
752  
753  
754  
755  
756  
757  
758  
759  
760  
761  
762  
763  
764  
765  
766  
767  
768  
769  
770  
771  
772  
773  
774  
775  
776  
777  
778  
779  
780  
781  
782  
783  
784  
785  
786  
787  
788  
789  
790  
791

## SUPPLEMENTAL DATA

### Intron-assisted, viroid-based production of insecticidal circular double-stranded RNA in *Escherichia coli*

Beltrán Ortolá<sup>a</sup>, Teresa Cordero<sup>a</sup>, Xu Hu<sup>b</sup> and José-Antonio Daròs<sup>a</sup>

<sup>a</sup>Instituto de Biología Molecular y Celular de Plantas (Consejo Superior de Investigaciones Científicas-Universitat Politècnica de Valencia), Valencia, Spain; <sup>b</sup>Corteva Agriscience, Johnston, Iowa, USA

**CONTACT:** José-Antonio Daròs, [jadaros@ibmcp.upv.es](mailto:jadaros@ibmcp.upv.es), IBMCP (CSIC-Universitat Politècnica de Valencia), Avenida de los Naranjos s/n, 46022 Valencia, Spain

**Supplemental Dataset S1.** Nucleotide sequences and elements of plasmids pLELVd, pLELVd-BZB, pLPP, pLELVd-DvSSJ1, pLELVdPIE-DvSSJ1, pLPIE-DvSSJ1, p15LtRnlSm, and p15CAT.

>pLELVd (2050 bp)

```
CGATGCTTCTTTGAGCGAACGATCAAAAATAAGTGCCTTCCCATCAAAAAAATATTCTCAACATAAAAACTTTG
TGTAATACTTGTAACGCTGCCCATAGGGTGGTGTGTGCCACCCCTGATGAGACCGAAAGGTCGAAATGGGGTTT
CGCCATGGGTCGGGACTTTAAATTCGGAGGATTCGTCTTTAAACGTTCCCTCCAAGAGTCCCTTCCCCAACCCCT
TACTTTGTAAGTGTGGTTCGGCGAATGTACCGTTTCGTCTTTTCGGACTCATCAGGGAAAGTACACACTTCCGA
CGGTGGGTTTCGTGACACCTCTCCCCCTCCAGGTAATATCCCTTTCAAGGATGTGTTCCTTAGGAGGGTGGGT
GTACCTCTTTTGGATTGCTCCGGCCTTCCAGGAGAGATAGAGGACGACCTCTCCCATAGGGTGGTGTGTGCCAC
CCCTGATGAGACCGAAAGGTCGAAATGGGGGAAATCATCTTAGCGAAAGCTAAGGATTTTTTTTATCTGAAATG
CGTTGCTGGCGTTTTTCCATAGGCTCCGCCCCCTGACGAGCATCAAAAAATCGACGCTCAAGTCAGAGGTGGC
GAAACCCGACAGGACTATAAAGATAACCAGGCGTTTTCCCCCTGGAAGCTCCCTCGTGCCTCTCTGTTCGACCC
TGCCGCTTACCGGATACCTGTCCGCTTTCTCCCTTCGGGAAGCGTGGCGCTTCTCATAGCTCACGCTGTAGGT
ATCTCAGTTCCGTTGTAGGTTCGTTCCGCTCCAAGCTGGGCTGTGTGCACGAACCCCCCGTTCAGCCGACCGCTGCG
CCTTATCCGGTAACATATCGTCTTGAGTCCAACCCGGTAAGACACGACTTATCGCCACTGGCAGCAGCCACTGGTA
ACAGGATTAGCAGAGCGAGGTATGTAGGCGGTGCTACAGAGTTCTTGAAGTGGTGGCCTAACTACGGCTACACTA
GAAGGACAGTATTTGGTATCTGCGCTCTGCTGAAGCCAGTTACCTTCGGAAAAAGAGTTGGTAGCTCTTGATCCG
GCAAACAAACCACCGCTGGTAGCGGTGGTTTTTTTTGTTTGCAAGCAGCAGATTACGCGCAGAAAAAAGGATCTC
AAGAAGATCTTTTTTACCAATGCTTAATCAGTGAGGCACCTATCTCAGCGATCTGTCTATTTTCGTTTCATCCATAG
TTGCCTGACTCCCCGTGCTGTAGATAACTACGATACGGGAGGGCTTACCATCTGGCCCCAGTGTGCAATGATAC
CGCGAGAGCCACGCTCACCAGGCTCCAGATTTATCAGCAATAAACCAGCCAGCCGGAAGGGCCGAGCGCAGAAAGTG
GTCCTGCAACTTTATCCGCTCCATCCAGTCTATTAATTGTTGCCGGGAAGCTAGAGTAAGTAGTTTCGCCAGTTA
ATAGTTTGCACAACGTTGTTGCCATTGCTACAGGCATCGTGGTGTACGCTCGTCTGTTGGTATGGCTTCATTCA
GCTCCGGTTCCCAACGATCAAGGCGAGTTACATGATCCCCATGTTGTGCAAAAAAGCGGTTAGCTCCTTCGGTTC
CTCCGATCGTTGTCAGAAGTAAGTTGGCCGAGTGTATCACTCATGGTTATGGCAGCAGCTGCATAAATCTCTTA
CTGTCATGCCATCCGTAAGATGCTTTTTCTGTGACTGGTGAAGTACTCAACCAAGTCATTCTGAGAATAGTGATGC
GGCGACCGAGTTGCTCTTGGCCGCGTCAATACGGGATAAATACCGCGCCACATAGCAGAACTTTAAAAGTGCTCA
TCATTGGAAAACGTTCTTCGGGGCGAAAACCTCAAGGATCTTACCCTGTTGAGATCCAGTTTCGATGTAACCCA
CTCGTGCACCCAACTGATCTTACGATCTTTTACTTTACCAGCGTTTCTGGGTGAGCAAAAAACAGGAAGGCCAAA
ATGCCGCAAAAAAGGGAATAAGGGCGACACGGAAATGTTGAATACTCATACTCTTCTTTTCAATATTTATGAA
GCATTTATCAGGGTTATTGTCTCAT
```

In red, *E. coli* murein lipoprotein promoter. In bold, ELVd cDNA (C327 to G46 of AJ536613), with the repeated hammerhead ribozyme domain highlighted in yellow, and their self-cleavage sites underlined. In fuchsia, *E. coli* ribosomal rrnC terminator. In gray, pUC replication origin. Highlighted in light grey, ampicillin resistance gene (in reverse orientation), with the promoter highlighted in dark gray).

792  
793 >pLELVd-BZB (2574 bp)  
794 CGATGCTTCTTTGAGCGAACGATCAAAAATAAGTGCCTTCCCATCAAAAAAATATTCTCAACATAAAAACTTTG  
795 TGTAACTACTTGTAAACGCTG**CCCCATAGGGTGGTGTGTGCCACCCCTGATGAGACCGAAAGGTCGAAATGGGGTTT**  
796 CGCCATGGGTGGGACTTTAAATTCGGAGGATTTCGTCTTTAAACGTTCTTCCAAGAGTCCCTTCCCCAAACCCCT  
797 TACTTTTGTAAAGTGTGGTTTCGGCGAATGTACCGTTTCGTCTTTTCGGACTCATCAGGGAAAAGTACACACTTTCCGA  
798 CGGTGGGTTTCGTTCGACACCTCTCCCCCTCCCAGGTACTATCCCTT**GGGTCTTC**GGGGAAAAGCGGGCAGTGAGC  
799 GCAACGCAATTAATGTGAGTTAGCTCACTCATTAGGCACCCCAGGCTTTACACTTTATGCTTCCGGCTCGTATGT  
800 TGTGTGGAATTGTGAGCGGATAACAATTTACACAGGAAACAGCTATGACCATGATTACGCCAAGCGCGCAATTA  
801 ACCCTCACTAAAGGGAACAAAAGCTGGGTACCGGGCCCCCCCCCTCGAGGTGACGGTATCGATAAGCTTGATATCG  
802 AATTCCTGCAGCCCGGGGGTCCACTAGTTCTAGAGCGGCCACCGCGGTGGAGCTCCAATTCGCCCTATAGT  
803 GAGTCGTATTACGCGCGCTCACTGGCCGTCGTTTACAACGTCGTGACTGGGAAAACCCCTGGCGTTACCCAATT  
804 AATCGCCTTGACGACATCCCCCTTCGCCAGCTGGCGTAATAGCGAAGAGGCCCGCACCGGCTGCCCTTCCCAA  
805 CAGTTGCGCAGCCTGAATGGCGAATGGGACGCGGGCG**GAAGAC**GC**TCAAGGATGTGTTCCTTAGGAGGGTGGGTG**  
806 **TACCTCTTTTTGGATTGCTCCGGCCTTCCAGGAGAGATAGAGGACGACCTCTCCCCATAGGGTGGTGTGTGCCACC**  
807 **CCTGATGAGACCGAAAGGTCGAAATGGGG**GAAATCATCCTTAGCGAAAGCTAAGGATTTTTTTTATCTGAAATGC  
808 GTTGCTGGCGTTTTTCCATAGGCTCCGCCCCCTGACGAGCATCACAAAAATCGACGCTCAAGTCAGAGGTGGCG  
809 AAACCCGACAGGACTATAAAGATAACCAGGCGTTTTCCCCCTGGAAGCTCCCTCGTGCCTCTCCTGTTCCGACCCCT  
810 GCCGCTTACCGGATACCTGTCCGCCTTTCTCCCTTCGGGAAGCGTGGCGCTTTCTCATAGCTCACGCTGTAGGTA  
811 TCTCAGTTCGGTGTAGGTCGTTTCGCTCCAAGCTGGGCTGTGTGCACGAACCCCGTTCAGCCCGACCGCTGCGC  
812 CTTATCCGGTAACTATCGTCTTGAGTCCAACCCGGTAAGACACGACTTATCGCCACTGGCAGCAGCCACTGGTAA  
813 CAGGATTAGCAGAGCGAGGTATGTAGGCGGTGCTACAGAGTCTTGAAGTGGTGGCCTAACTACGGCTACACTAG  
814 AAGGACAGTATTTGGTATCTGCGCTCTGCTGAAGCCAGTTACCTTCGGAAAAAGAGTTGGTAGCTCTTGATCCGG  
815 CAAACAAACCACCGCTGGTAGCGGTGGTTTTTTTTGTTTTGCAAGCAGCAGATTACGCGCAGAAAAAAGGATCTCA  
816 AGAAGATCCTTTTTACCAATGCTTAATCAGTGAGGCACCTATCTCAGCGATCTGTCTATTTTCGTTTCATCCATAGT  
817 TGCCTGACTCCCCGTCGTGTAGATAACTACGATACGGGAGGGCTTACCATCTGGCCCCAGTGCTGCAATGATACC  
818 GCGAGAGCCACGCTCACCGGCTCCAGATTTATCAGCAATAAACAGCCAGCCGGAAGGGCCGAGCGCAGAAAGTGG  
819 TCCTGCAACTTATCCGCCTCCATCCAGTCTATTAATTGTTGCCGGGAAGCTAGAGTAAGTAGTTCGCCAGTTAA  
820 TAGTTTGGCACAACGTTGTTGCCATTGCTACAGGCATCGTGGTGTACGCTCGTCTGTTGGTATGGCTTCATTCAG  
821 CTCGGTTCCCAACGATCAAGGCGAGTTACATGATCCCCATGTTGTGCAAAAAAGCGGTTAGCTCCTTCGGTCC  
822 TCCGATCGTTGTGAGAAGTAAGTTGGCCGAGTGTATCACTACTGTTATGGCAGCAGCTGCATAAATCTCTTAC  
823 TGTGATGCCATCCGTAAGATGCTTTTTCTGTGACTGGTGTGAGTACTCAACCAAGTCATTCTGAGAATAGTGTATGCG  
824 GCGACCGAGTTGCTCTTGCCCGCGTCAATACGGGATAATACCGCGCCACATAGCAGAACTTTAAAAGTGCTCAT  
825 CATTGGAAAACGTTCTTCGGGGCGAAAACTCTCAAGGATCTTACCGCTGTTGAGATCCAGTTCGATGTAACCCAC  
826 TCGTGCACCCAACTGATCTTCAGCATCTTTTACTTTACCAGCGTTTCTGGGTGAGCAAAAAACAGGAAGGCAAAA  
827 TGCCGCAAAAAAGGGAATAAGGGCGACACGGAAATGTTGAATACTCATACTCTTCTTTTTCAATATTATTGAAG  
828 CATTATCAGGGTTATTGTCTCAT  
829

830 In red, *E. coli* murein lipoprotein promoter. In bold, (C327 to G46 of AJ536613), with the  
831 repeated hammerhead ribozyme domain **highlighted in yellow**, and their self-cleavage sites  
832 **underlined**. In blue cDNA coding for LacZ gene inserted between T245 and T246 of ELVd  
833 cDNA. **Highlighted in dark blue**, recognition sites for type-IIS restriction enzyme BpiI, with  
834 the cleavage sites in **underlined bold**. In fuchsia, *E. coli* ribosomal rrnC terminator. In gray,  
835 pUC replication origin. **Highlighted in light grey**, ampicillin resistance gene (in reverse  
836 orientation), with the promoter **highlighted in dark gray**).

837  
838 >pLPP (1916 bp)  
839 CGATGCTTCTTTGAGCGAACGATCAAAAATAAGTGCCTTCCCATCAAAAAAATATTCTCAACATAAAAACTTTG  
840 TGTAACTACTTGTAAACGCTG**GAGACCGCGG**CAGGAAACAGCTATGACCATGATTACGCCAAGCGCGCAATTAACC  
841 CTCACTAAAGGGAACAAAAGCTGGGTACCGGGCCCCCCCCCTCGAGGTGACGGTATCGATAAGCTTGATATCGAAT  
842 TCCTGCAGCCCGGGGATCCACTAGTTCTAGAGCGGCCGCCACCGCGGTGGAGCTCCAATTCGCCCTATAGTGAG  
843 TCGTATTACGCGCGCTCACTGGCCGTCGTTTTACAGGCG**GGTCTCG**GAAATCATCCTTAGCGAAAGCTAAGGATT  
844 TTTTTTATCTGAAATGCGTTGCTGGCGTTTTTTCCATAGGCTCCGCCCCCTGACGAGCATCACAAAAATCGACGC  
845 TCAAGTCAGAGGTGGCGAAACCCGACAGGACTATAAAGATAACCAGGCGTTTTCCCCCTGGAAGCTCCCTCGTGC  
846 TCTCCTGTTCCGACCCCTGCCGCTTACCGGATACCTGTCCGCCTTTCTCCCTTCGGGAAGCGTGGCGCTTTCTCAT  
847 AGCTCACGCTGTAGGTATCTCAGTTCGGTGTAGGTGTTTCGCTCCAAGCTGGGCTGTGTGCACGAACCCCGGTT  
848 CAGCCCGACCGCTGCGCCTTATCCGGTAACATCGTCTTGAGTCCAACCCGGTAAGACACGACTTATCGCCACTG  
849 GCAGCAGCCACTGGTAACAGGATTAGCAGAGCGAGGTATGTAGGCGGTGCTACAGAGTCTTGAAGTGGTGGCCT  
850 AACTACGGCTACACTAGAAGGACAGTATTTGGTATCTGCGCTCTGCTGAAGCCAGTTACCTTCGGAAAAAGAGTT

```
851 GGTAGCTCTTGATCCGGCAAACAAACCACCGCTGGTAGCGGTGGTTTTTTTTGTTTGCAAGCAGCAGATTACGCGC
852 AGAAAAAAGGATCTCAAGAAGATCCTTTTTTACCAATGCTTAATCAGTGAGGCACCTATCTCAGCGATCTGTCTA
853 TTTCGTTTCATCCATAGTTGCCTGACTCCCCGTCGTGTAGATAACTACGATACGGGAGGGCTTACCATCTGGCCCC
854 AGTGCTGCAATGATACCGCGAGAGCCACGCTCACC GGCTCCAGATTTATCAGCAATAAACAGCCAGCCGGAAGG
855 GCCGAGCGCAGAAGTGGTCTGCAACTTTATCCGCTCCATCCAGTCTATTAATTGTTGCCGGGAAGCTAGAGTA
856 AGTAGTTCGCCAGTTAATAGTTTGGCGAACGTTGTTGCCATTGCTACAGGCATCGTGGTGTACAGCTCGTCTGTTT
857 GGTATGGCTTCATTACAGCTCCGGTTCCCAACGATCAAGGCGAGTTACATGATCCCCCATGTTGTGCAAAAAAGCG
858 GTTAGCTCCTTCGGTCTCCGATCGTTGTGAGAAGTAAGTTGGCCGAGTGTATCACTCATGGTTATGGCAGCA
859 CTGCATAATTCTCTTACTGTCTATGCCATCCGTAAGATGCTTTTCTGTGACTGGTGGTACTCAACCAAGTCATTC
860 TGAGAATAGTGTATGCGGCGACCGAGTTGCTTTCGCCGCGTCAATACGGGATAATACCGCGCCACATAGCAGA
861 ACTTTAAAAGTGCTCATCATTGAAAACGTTCTTCGGGGCGAAAACTCTCAAGGATCTTACCCTGTTGAGATCC
862 AGTTCGATGTAACCCACTCGTGCACCCAACTGATCTTCAGCATCTTTTACTTTACCAGCGTTTCTGGGTGAGCA
863 AAAACAGGAAGGCAAAATGCCGCAAAAAAGGGAATAAGGGCGACACGGAAATGTTGAATACTCATACTCTTCCTT
864 TTTCAATATTATTGAAGCATTATCAGGGTTATTGTCTCAT
865
```

866 In red, *E. coli* murein lipoprotein promoter. In bold blue, polylinker with double recognition  
867 sites for the type IIS enzyme BsaI (highlighted in yellow, with the cleavage sites underlined)  
868 separating the polylinker from the plasmid pBSIKS + (in reverse, in blue italics). In fuchsia,  
869 *E. coli* ribosomal *rrnC* terminator. In gray, pUC replication origin. Highlighted in light grey,  
870 ampicillin resistance gene (in reverse orientation), with the promoter highlighted in dark gray).

```
871  
872 >pLELVd-DvSSJ1 (2649 bp)  
873 CGATGCTTCTTTGAGCGAACGATCAAAAAATAAGTGCCTTCCCATCAAAAAATATTCTCAACATAAAAAACTTTG  
874 TGTAACTTGTAAACGCTGCCCCATAGGGTGGTGTGTGCCACCCCTGATGAGACCGAAAGGTCGAAATGGGGTTT  
875 CGCCATGGGTCCGGACTTTAAATTCGGAGGATTTCGTCTTTAAACGTTCTCCAAGAGTCCCTTCCCCAAACCCCT  
876 TACTTTGTAAGTGTGGTTCGGCGAATGTACCGTTTCGTCTTTCCGACTCATCAGGGAAAAGTACACACTTTCCGA  
877 CGGTGGGTTCGTGACACCTCTCCCCCTCCAGGTAATCCCTTACCATTTGTCCTGAAATTTGCTGAAGTTGGT  
878 GATCAATTTGATATGTCTCATCTTGTACCGAACCGGATATCAAGGCTACTTCTTATGACTCTCTAAATAGCAATA  
879 TTTACCTTTGGAGGGAAAAGTTATCAGGCATGCACCTGGTAGCTAGTCTTTAAACCAATAGATTGCATCGGTTTA  
880 AAAGGCAAGACCGTCAAATTCGGGAAAGGGGTCAACAGCCGTTACGATACCAAGTCTCAGGGGAAACTTTGAGAT  
881 GGCTTTGCAAAAGGGTATGGTAATAAGCTGACGGACATGGTCTTAACCACGACGCAAGTCTAAGTCAACAGATC  
882 TTCTGTTGATATGGATGCAGTTCACAGACTAAATGTCGGTTCGGGGAAGATGTATTCTTTCATAAGATATAGTCG  
883 GACCTCTCCTTAATGGGAGCTAGCGGATGAAGTGATGCAACACTGGAGCCGCTGGGAACATAATTTGTATGCGAAA  
884 GTATATTGATTAGTTTTGGAGTACTCGTAAGGTAGCAAGAAGTAGCCTTGATATCCGGTTCGGTACAAGATGAGA  
885 CATATCAAATTTGATCACCAACTTCAGCAATTTCAGGACAATGGTTCAAAGGATGTGTTCCCTAGGAGGGTGGGTGT  
886 ACCTCTTTTGGATTGCTCCGGCCTTCCAGGAGAGATAGAGGACGACCTCTCCCCATAGGGTGGTGTGTGCCACCC  
887 CTGATGAGACCGAAAGGTCGAAATGGGGGAATCATCTTAGCGAAAGCTAAGGATTTTTTTTTATCTGAAATGCG  
888 TTGCTGGCGTTTTTCCATAGGCTCCGCCCCCTGACGAGCATCAAAAAATCGACGCTCAAGTCAGAGGTGGCGA  
889 AACCCGACAGGACTATAAAGATAACCAGGCGTTTCCCCCTGGAAGCTCCCTCGTGCCTCTCTGTTCCGACCCTG  
890 CCGCTTACCGGATACCTGTCCGCTTTCTCCCTTCGGGAAGCGTGGCGCTTCTCATAGCTCAGCTGTAGGTAT  
891 CTCAGTTCCGGTGTAGGTGCTTCCGCTCCAAGCTGGGCTGTGTGCACGAACCCCCCGTTACAGCCGACCGCTGCGCC  
892 TTATCCGGTAACTATCGTCTTGAGTCCAACCCGGTAAGACACGACTTATCGCCACTGGCAGCAGCCACTGGTAAC  
893 AGGATTAGCAGAGCGAGGTATGTAGGCGGTGCTACAGAGTTCTTGAAGTGGTGGCTAACTACGGCTACACTAGA  
894 AGGACAGTATTTGGTATCTGCGCTCTGCTGAAGCCAGTTACCTTCGGAAAAAGAGTTGGTAGCTCTTGATCCGGC  
895 AAACAAACCACCGCTGGTAGCGGTGGTTTTTTTTGTTTGCAAGCAGCAGATTACGCGCAGAAAAAAGGATCTCAA  
896 GAAGATCCTTTTTTACCAATGCTTAATCAGTGAGGCACCTATCTCAGCGATCTGTCTATTTCTGTTTCATCCATAGTT  
897 GCCTGACTCCCCGTCGTGTAGATAACTACGATACGGGAGGGCTTACCATCTGGCCCCAGTGTGCAATGATACCG  
898 CGAGAGCCACGCTCACCGGCTCCAGATTTATCAGCAATAAACACGACGCGGAAAGGCGGAGCGCAGAAAGTGGT  
899 CCTGCAACTTTATCCGCTCCATCCAGTCTATTAATTTGTTGCCGGAAGCTAGAGTAAGTAGTTTCGCCAGTTAAT  
900 AGTTTGGCGAACGTTGTTGCCATTGCTACAGGCATCGTGGTGTACAGCTCGTCTGTTGGTATGGCTTCATTCAGC  
901 TCCGGTTCCCAACGATCAAGGCGAGTTACATGATCCCCCATGTTGTGCAAAAAAGCGGTTAGCTCCTTCGGTCTCT  
902 CCGATCGTTGTGAGAAGTAAGTTGGCCGAGTGTATCACTCATGGTTATGGCAGCACTGCATAATTTCTCTTACT  
903 GTCATGCCATCCGTAAGATGCTTTTCTGTGACTGGTGGTACTCAACCAAGTCATTTCTGAGAATAGTGTATGCGG  
904 CGACCGAGTTGCTCTTGGCCGCGTCAATACGGGATAATACCGCGCCACATAGCAGAACTTTAAAAGTGCTCATC  
905 ATTGAAAACGTTCTTCGGGGCGAAAACTCTCAAGGATCTTACCCTGTTGAGATCCAGTTCGATGTAACCCACT  
906 CGTGCACCCAACTGATCTTCAGCATCTTTTACTTTACCAGCGTTTCTGGGTGAGCAAAAAACAGGAAGGCAAAAT  
907 GCCGCAAAAAAGGGAATAAGGGCGACACGGAAATGTTGAATACTCATACTCTTCCTTTTTTCAATATTATTGAAGC  
908 ATTTATCAGGGTTATTGTCTCAT  
909
```

910 In **red**, *E. coli* murein lipoprotein promoter. In **bold**, (C327 to G46 of AJ536613), with the  
911 repeated hammerhead ribozyme domain **highlighted in yellow**, and their self-cleavage sites  
912 **underlined**. **Highlighted in green**, inverted repeat of an 83 nt fragment of the *DvSSJ1* gene  
913 inserted between T245 and T246 of ELVd cDNA. In **green**, between the two copies of the  
914 *DvSSJ1* gene, the cDNA of the group-I *Tetrahymena termophila* 26S rRNA intron, with the 10  
915 nt of both flanking exons **underlined**. In **fuchsia**, *E. coli* ribosomal *rrnC* terminator. In gray,  
916 pUC replication origin. **Highlighted in light grey**, ampicillin resistance gene (in reverse  
917 orientation), with the promoter **highlighted in dark grey**).

918  
919 >pLELVdPIE-DvSSJ1 (3080 bp)  
920 CGATGCTTCTTTGAGCGAACGATCAAAAATAAGTGCCTTCCCATCAAAAAATATTCTCAACATAAAAACTTTG  
921 TGTAACTTGTAAACGCTG**CCCCATAGGGTGGTGTGTGCCACCCCTGATGAGACCGAAAGGTCGAAATGGGGTTT**  
922 CGCCATGGGTGGGACTTTAAATTCGGAGGATTTCGTCTTTAAACGTTCTCCAAGAGTCCCTTCCCCAAACCT  
923 TACTTTGTAAGTGTGGTTCGGCGAATGTACCGTTTCGTCTTTTCGGACTCATCAGGGAAAGTACACACTTTCCGA  
924 CGGTGGGTTTCGTGCACACCTCTCCCCCTCCAGGTACTATCCCCCTTCTTCTGTTGATATGGATGCAGTTCACAGA  
925 CTAAATGTCGGTCGGGGAAGATGTATTCTTCTCATAAGATATAGTCGGACCTCTCCTTAATGGGAGCTAGCGGAT  
926 GAAGTGATGCAACACTGGAGCCGCTGGGAACCTAATTTGTATGCGAAAGTATATTGATTAGTTTGGAGTACTCGT  
927 AAGGTAGC**ACCATTGTCCTGAAATTGCTGAAGTTGGTGATCAATTTGATATGTCTCATCTTGTACCGAACCGGAT**  
928 **ATCAAGGCTACTTCTT**ATGACTCTCTAAATAGCAATATTTACCTTTGGAGGGAAAAAGTTATCAGGCATGCACCTG  
929 GTAGCTAGTCTTTAAACCAATAGATTGCATCGGTTTAAAAGGCAAGACCGTCAAATTCGGGAAAGGGGTCAACA  
930 GCCGTTTCAGTACCAAGTCTCAGGGGAAACTTTGAGATGGCCTTGCAAAGGGTATGGTAATAAGCTGACGGACATG  
931 GTCCTAACCCACGCAGCCAAGTCTTAAGTCAACAGATCTTCTGTTGATATGGATGCAGTTCACAGACTAAATGTGC  
932 GTCGGGGAAGATGTATTCTTCTCATAAGATATAGTCGGACCTCTCCTTAATGGGAGCTAGCGGATGAAGTGATGC  
933 AACACTGGAGCCGCTGGGAACCTAATTTGTATGCGAAAGTATATTGATTAGTTTGGAGTACTCGTAAGGTAGC**AA**  
934 **GAAGTAGCCTTGATATCCGGTTCGGTACAAGATGAGACATATCAAATTGATCACCAACTTCAGCAATTCAGGAC**  
935 **AATGGT**ATGACTCTCTAAATAGCAATATTTACCTTTGGAGGGAAAAAGTTATCAGGCATGCACCTGGTAGCTAGTC  
936 TTTAAACCAATAGATTGCATCGGTTTAAAAGGCAAGACCGTCAAATTCGGGAAAGGGGTCAACAGCCGTTTCAGT  
937 ACCAAGTCTCAGGGGAAACTTTGAGATGGCCTTGCAAAGGGTATGGTAATAAGCTGACGGACATGGTCTTAACCA  
938 CGCAGCCAAGTCTTAAGTCAACAGAT**TCAAGGATGTGTTCCCTAGGAGGGTGGGTGTACCTCTTTTGGATTGCTC**  
939 **CGGCCTTCCAGGAGAGATAGAGGACGACCTCT****CCCCATAGGGTGGTGTGTGCCACCCCTGATGAGACCGAAAGGT**  
940 **CGAAATGGGG****GAAATCATCTTAGCGAAAGCTAAGGATTTTTTTTATCTGAAAT**GCGTTGCTGGCGTTTTTCCAT  
941 AGGCTCCGCCCCCTGACGAGCATCACAAAATCGACGCTCAAGTCAGAGGTGGCGAAACCCGACAGGACTATAA  
942 AGATAACAGGCGTTTTCCCCCTGGAAGCTCCCTCGTGCCTCTCCTGTTCCGACCCCTGCCGCTTACCGGATACCTG  
943 TCCGCTTTCTCCCTTCGGGAAGCGTGGCGCTTTCTCATAGCTCACGCTGTAGGTATCTCAGTTCGGTGTAGGTC  
944 GTTCGCTCCAAGCTGGGCTGTGTGCACGAACCCCCCGTTTCAGCCGACCGCTGCGCCTTATCCGGTAACCTATCGT  
945 CTTGAGTCCAACCCGGTAAGACACGACTTATCGCCACTGGCAGCAGCCACTGGTAAACAGGATTAGCAGAGCGAGG  
946 TATGTAGGCGGTGCTACAGAGTCTTGAAGTGGTGGCCTAACTACGGCTACACTAGAAGGACAGTATTTGGTATC  
947 TGCGCTCTGCTGAAGCCAGTTACCTTCGGAAAAAGAGTTGGTAGCTCTTGATCCGGCAAAACAAACCCGCTGGT  
948 AGCGGTGGTTTTTTTTGTTTGCAAGCAGCAGATTACGCGCAGAAAAAAGGATCTCAAGAAGATCCTTTT**TACCAA**  
949 **TGCTTAATCAGTGAGGCACCTATCTCAGCGATCTGTCTATTTTCGTTTCATCCATAGTTGCCTGACTCCCCGTCGTG**  
950 **TAGATAACTACGATACGGGAGGGCTTACCATCTGCGCCAGGCTGCAATGATACCCGAGACCCAGCTCACCG**  
951 **GCTCCAGATTTATCAGCAATAAACCCAGCCAGCCGGAAGGCGGAGCGCAGAAGTGGTCTGCACTTATCCGCC**  
952 **TCCATCCAGTCTATTAATTGTTGCCGGGAAGCTAGAGTAAGTAGTTCGCCAGTTAATAGTTTGCACAACGTGTT**  
953 **GCCATTGCTACAGGCATCGTGGTGTACGCTCGTCTGTTGGTATGGCTTCATTCAGCTCCGGTTCCCAACGATCA**  
954 **AGGCGAGTTACATGATCCCCATGTTGTGCAAAAAAGCGGTTAGCTCCTTCGGTCTCCGATCGTTGTCAGAAGT**  
955 **AAGTTGGCCGAGTGTATCACTCATGGTTATGGCAGCACTGCATAATTCTCTTACTGTCATGCCATCCGTAAGA**  
956 **TGCTTTTCTGTGACTGGTGAAGTACTCAACCAAGTCATTCTGAGAATAGTGTATGCGGCGACCGAGTTGCTCTTGC**  
957 **CCGGCGTCAATACGGGATAATACCGCGCCACATAGCAGAACTTTAAAAGTGTCTCATCATTTGAAAACGTTCTTCG**  
958 **GGGCGAAAACCTCAAGGATCTTACCCTGTTGAGATCCAGTTTCGATGTAACCCACTCGTGCACCAACTGATCT**  
959 **TCAGCATCTTTTACTTTTACCAGCGTTTCTGGGTGAGCAAAAACAGGAAGGCAAAATGCCGAAAAAGGGAATA**  
960 **AGGGCGACACGGAAATGTTGAATACTCATACTCTTCTTTTCAATATTATTGAAGCATTTATCAGGGTTATTGT**  
961 **CTCAT**

963 In **red**, *E. coli* murein lipoprotein promoter. In **bold**, (C327 to G46 of AJ536613), with the  
964 repeated hammerhead ribozyme domain **highlighted in yellow**, and their self-cleavage sites  
965 **underlined**. In **orange**, inserted between T245 and T246 of ELVd cDNA, group-I *Tetrahymena*  
966 *termophila* 26S rRNA intron with intron-exon permutation between T235 and C236; 10 nt of  
967 both flanking exons **underlined**. **Highlighted in green**, inverted repeat of an 83-nt fragment of



968 the *DvSSJ1* gene. In green, non-permuted sequence of the same intron, with the 10 nt of both  
969 flanking exons underlined. In fuchsia, *E. coli* ribosomal *rrnC* terminator. In gray, pUC  
970 replication origin. Highlighted in light grey, ampicillin resistance gene (in reverse orientation),  
971 with the promoter highlighted in dark gray).

972  
973 >pLPIE-DvSSJ1 (2694 bp)  
974 CGATGCTTCTTTGAGCGAACGATCAAAAATAAGTGCCTTCCCATCAAAAAATATTCTCAACATAAAAACTTTG  
975 TGTAATACTTGTAACGCTGCTTCTGTTGATATGGATGCAGTTCACAGACTAAATGTCGGTCGGGGAAGATGTATT  
976 CTTCTCATAAGATATAGTCGGACCTCTCCTTAATGGGAGCTAGCGGATGAAGTGATGCAACACTGGAGCCGCTGG  
977 GAACTAATTTGTATGCGAAAGTATATTGATTAGTTTTGGAGTACTCGTAAGGTAGCACTTGTCTGAAATTTGC  
978 TGAAGTTGGTGTATCAATTTGATATGTCTCATCTTGTACCGAACCGATATCAAGGCTACTTCTTATGACTCTCTA  
979 AATAGCAATATTTACCTTTGGAGGGAAAAGTTATCAGGCATGCACCTGGTAGCTAGTCTTTAAACCAATAGATTG  
980 CATCGGTTTTAAAAGGCAAGACCGTCAAATTTGCGGGAAAAGGGGTCAACAGCCGTTTCAAGTACCAAGTCTCAGGGGAA  
981 ACTTTGAGATGGCCTTGCAAAGGGTATGGTAATAAGCTGACGGACATGGTCTTAACCACGCAGCCAAGTCTTAAG  
982 TCAACAGATCTTCTGTTGATATGGATGCAGTTCACAGACTAAATGTCGGTCGGGGAAGATGTATTCTTCTCATAA  
983 GATATAGTCGGACCTCTCCTTAATGGGAGCTAGCGGATGAAGTGATGCAACACTGGAGCCGCTGGGAACTAATTT  
984 GTATGCGAAAGTATATTGATTAGTTTTGGAGTACTCGTAAGGTAGCAAGAAGTAGCCTTGATATCCGGTTCGGTA  
985 CAAGATGAGACATATCAAATTTGATCACCACCTTCAAGCAATTTCAAGGACAATGGTATGACTCTCTAAATAGCAATA  
986 TTTACCTTTGGAGGGAAAAGTTATCAGGCATGCACCTGGTAGCTAGTCTTTAAACCAATAGATTGCATCGGTTTTA  
987 AAAGGCAAGACCGTCAAATTTGCGGGAAAAGGGGTCAACAGCCGTTTCAAGTACCAAGTCTCAGGGGAAACTTTGAGAT  
988 GGCCTTGCAAAGGGTATGGTAATAAGCTGACGGACATGGTCTTAACCACGCAGCCAAGTCTTAAGTCAACAGATG  
989 AAATCATCCTTAGCGAAAGCTAAGGATTTTTTTTTATCTGAAATGCGTTGCTGGCGTTTTTTCCATAGGCTCCGCCC  
990 CCCTGACGAGCATCACAAAAATCGACGCTCAAGTCAGAGGTGGCGAAAACCCGACAGGACTATAAAGATAACCAGGC  
991 GTTTCCCCCTGGAAGCTCCCTCGTGCCTCTCCTGTTCCGACCCTGCCGCTTACCGGATACCTGTCCGCTTTCT  
992 CCCTTCGGGAAGCGTGGCGCTTTCTCATAGCTCACGCTGTAGGTACTCTCAGTTCGGTGTAGGTGCTTCGCTCCAA  
993 GCTGGGCTGTGTGCACGAACCCCGTTTACGCCCCGACCCGCTTATCCGGTAACTATCGGTAAGTATGAGTCCAA  
994 CCCGGTAAGACACGACTTATCGCCACTGGCAGCAGCCACTGGTAACAGGATTAGCAGAGCGAGTATGTAGGCGG  
995 TGCTACAGAGTCTTGAAGTGGTGGCCTAACTACGGCTACACTAGAAGGACAGTATTTGGTATCTGCGCTCTGCT  
996 GAAGCCAGTTACCTTCGGAAAAGAGTTGGTAGCTCTTGATCCGGCAAACAAACCACCGCTGGTAGCGGTGGTTTT  
997 TTTTGTGTTGCAAGCAGCAGATTACGCGCAGAAAAAAGGATCTCAAGAAGATCCTTTTACCAATGCTTAATCAG  
998 TGAGGCACCTATCTCAGCGATCTGTCTATTTTCGTTTATCCATAGTTGCCTGACTCCCCGTCGTGTAGATAACTAC  
999 GATACGGGAGGGCTTACCATCTGGCCCCAGTGCTGCAATGATACCGCGAGAGCCACGCTCACCAGGCTCCAGATTT  
1000 ATCAGCAATAAACCAGCCAGCCGGAAGGGCCGAGCGCAGAAGTGGTCTTCAACTTTATCCGCTCCATCCAGTC  
1001 TATTAATTGTTGCCGGGAAGCTAGAGTAAGTAGTTCGCCAGTTAATAGTTTGGCAACGTTGTTGCCATTGCTAC  
1002 AGGCATCGTGGTGTACGCTCGTCTGTTTGGTATGGCTTCATTCAGCTCCGGTTCCCAACGATCAAGGCGAGTTAC  
1003 ATGATCCCCCATGTTGTGCAAAAAGCGGTTAGCTCCTTCGGTCTCCGATCGTTGTCAGAAGTAAGTTGGCCGC  
1004 AGTGTATCACTCATGGTTATGGCAGCACTGCATAATTCTTACTGTGATGCCATCCGTAAGATGCTTTTCTGT  
1005 GACTGGTGAGTACTCAACCAAGTCATTCTGAGAATAGTGTATGCGGCGACCGAGTTGCTCTTGCCTGGCGTCAAT  
1006 ACGGGATAATACCGCGCCACATAGCAGAATTTAAAAGTGCTCATCATTTGAAAAACGTTCTTTCGGGGCGAAAAC  
1007 TCAAGGATCTTACCGCTGTTGAGATCCAGTTCGATGTAACCCACTCGTGCACCCAACCTGATCTTCAAGCATCTTT  
1008 TACTTTACCAGCGTTTCTGGGTGAGCAAAAACAGGAAGGCAAAATGCCGAAAAAAGGGAATAAGGGCGACACG  
1009 GAAATGTTGAATACTCATACTCTTCTTTTCAATATTATTGAAGCATTATTCAGGGTTATTGTCTCAT

1011 In red, *E. coli* murein lipoprotein promoter. In orange, group-I *Tetrahymena thermophila* 26S  
1012 rRNA intron with intron-exon permutation between T235 and C236; 10-nt of both flanking  
1013 exons underlined. Highlighted in green, inverted repeat of an 83-nt fragment of the *DvSSJ1*  
1014 gene. In green, non-permuted sequence of the same intron, with the 10 nt of both flanking  
1015 exons underlined. In fuchsia, *E. coli* ribosomal *rrnC* terminator. In gray, pUC replication origin.  
1016 Highlighted in light grey, ampicillin resistance gene (in reverse orientation), with the promoter  
1017 highlighted in dark gray).

1018  
1019 >p15LtRn1Sm (5415 bp)  
1020 CCGGGGGGGCGGGCGGGCCCGCCCGGAAATCGATGCTTCTTTGAGCGAACGATCAAAAATAAGTGCCTTCCCATCAAA  
1021 AAAATATTCTCAACATAAAAACTTTGTGTAATACTTGTAACGCTGGGAGACCACAACGGTTTCCCTCTAGAAA  
1022 TAATTTGTTTAACTTTAAGAAGGAGATATACCATGTCGGTTCGCATAGGGTCATTTACTCTTTCACTCATTAC  
1023 AAACCTCTATAATCTCTCTTCTTTATCATCTTTGCTTCTAGAATCTTCTTCCCTTTTCAATCTCTTCTCTT  
1024 CACACGTTCTTCACTCATGCCAACAAATCAGGAAAGGGGTGGTTATGAAGGAAAAAATGGCAAGTGAGGCCA  
1025 AGTTCCAATAGGGTACCAGGCTCGTCTTCAAATGTGGAACCTGTATCTGCTGCAACTGCTGAAGCCATTACCGAC



1087 AACGTTTCAGTTTGCTCATGGAAAACGGTGTAAACAAGGGTGAACACTATCCCATATCACCAGCTCACCGTCTTTC  
1088 ATTGCCATACGGAATTCGGGATGAGCATTTCATCAGGCGGGCAAGAATGTGAATAAAGGCCGGATAAAACTTGTGC  
1089 TTATTTTTCTTTACGGTCTTTAAAAAGGCCGTAATATCCAGCTGAACGGTCTGGTTATAGGTACATTGAGCAACT  
1090 GACTGAAATGCCTCAAATGTTCTTTACGATGCCATTGGGATATATCAACGGTGGTATATCCAGTGATTTTTTTTC  
1091 TCCATTTTAGCTTCCTTAGCTCCTGAAAATCTCGATAACTCAAAAAATACGCCCGGTAGTGATCTTATTTTCATTA  
1092 TGGTGAAAGTTGGAA

1093  
1094 In **red**, *E. coli* murein lipoprotein promoter. In **bold**, chloroplastic isoform of the eggplant tRNA  
1095 ligase (JX0225157), with the theoretical amino-terminal transit peptide **highlighted in green**,  
1096 the carboxyl terminal hexahistidine tag in **blue** and the start and stop codons **underlined**. In  
1097 **fuchsia**, T7 bacteriophage terminator. In gray, p15A replication origin. **Highlighted in light**  
1098 **grey**, chloramphenicol resistance gene (in reverse orientation), with the promoter **highlighted**  
1099 **in dark gray**).

1100  
1101 >p15CAT (1634 bp)  
1102 **CCCCGGGGCGGGCGGGCCGGCGGACGTGGCGCCTAAGGGGCGAGATCTGGCGGGGCC** GCGCTAGCGGAGTGTA  
1103 TACTGGCTTACTATGTTGGCACTGATGAGGGTGTGAGTGAAGTGCTTCATGTGGCAGGAGAAAAAGGCTGCACC  
1104 GGTGCGTCAGCAGAATATGTGATACAGGATATATTCCGCTTCCTCGCTCACTGACTCGCTACGCTCGGTGCTTCG  
1105 ACTGCGGCGAGCGGAAATGGCTTACGAAACGGGGCGGAGATTTCTGGAAGATGCCAGGAAGATACTTAACAGGGA  
1106 AGTGAGAGGGCGCGGAAATGGCTTACGAAACGGGGCGGAGATTTCTGGAAGATGCCAGGAAGATACTTAACAGGGA  
1107 AATCAGTGGTGGCGAAACCCGACAGGACTATAAAGATACCAGGCGTTTCCCGCTGGCGGCTCCCTCGTGCCTCT  
1108 CCTGTTCTGCTTTTCGGTTTACCGGTGTCATTCCGCTGTTATGGCCGCGTTTGTCTCATTCCACGCTGACACT  
1109 CAGTTCGGGTAGGCAGTTCGCTCCAAGCTGGACTGTATGCACGAAACCCCGTTTTCAGTCCGACCGCTGCGCCTT  
1110 ATCCGGTAACTATCGTCTTGAGTCCAACCCGAAAGACATGCAAAAGCACCCTGGCAGCAGCCACTGGTAATTG  
1111 ATTTAGAGGAGTTAGTCTTGAAGTCATGCGCCGGTTAAGGCTAAACTGAAAGGACAAGTTTTGGTGACTGCGCTC  
1112 CTCCAAGCCAGTTACCTCGGTTCAAAGAGTTGGTAGCTCAGAGAACCTTCGAAAAACCGCCTGCAAGGCGGTTT  
1113 TTTCTGTTTTAGAGCAAGAGATTACGCGCAGACCAAAACGATCTCAAGAAGATCATCTTATTAATTACGCCCCGC  
1114 CCTGCCACTCATCGCAGTACTGTTGTAATTCATTAAGCATTCTGCCGACATGGAAGCCATCACAGACGGCATGAT  
1115 GAACCTGAATCGCCAGCGGCATCAGCACCTTGTGCTTGGTATAATATTTGCCCATGGTGAAAACGGGGCGA  
1116 AGAAGTTGTCCATATTGGCCACGTTTAAATCAAACTGGTGAACCTCACCCAGGGATTGGCTGAGACGAAAAACA  
1117 TATTCTCAATAAACCTTTAGGGAAATAGGCCAGGTTTTACCGTAACACGCCACATCTTGCGAATATATGTGTA  
1118 GAAACTGCCGAAATCGTCTGTTGTTACTCCAGAGCGATGAAAACGTTTTCAGTTTGGCTCATGGAAAACGGTGT  
1119 AACAAGGGTGAACACTATCCCATATCACCAGCTCACCGTCTTTCATTGCCATACGGAATTCGGGATGAGCATTCA  
1120 TCAGGCGGGCAAGAATGTGAATAAAGGCCGATAAACTTGTGCTTATTTTTCTTTACGGTCTTTAAAAAGGCCG  
1121 TAATATCCAGCTGAACGGTCTGGTTATAGGTACATTGAGCAACTGACTGAAATGCCTCAAATGTTCTTTACGAT  
1122 GCCATTGGGATATATCAACGGTGGTATATCCAGTGATTTTTTTCTCCATTTTAGCTTCCTTAGCTCCTGAAAATC  
1123 TCGATAACTCAAAAAATACGCCCGGTAGTGATCTTATTTTCATTATGGTGAAAGTTGGAA

1124  
1125 In gray, p15A replication origin. **Highlighted in light grey**, chloramphenicol resistance gene (in  
1126 reverse orientation), with the promoter **highlighted in dark gray**. **Highlighted in yellow**,  
1127 polylinker with recognition sites for NotI (**underlined**) and BglII (**underlined**).

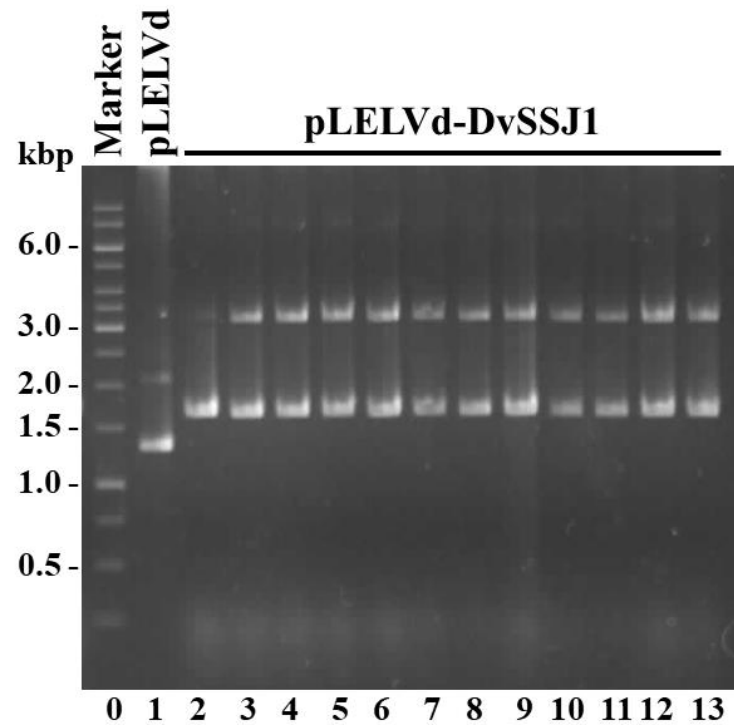

1128  
1129  
1130  
1131  
1132  
1133  
1134  
1135  
1136

**Supplemental Figure S1.** Construction of expression plasmids to produce *DvSSJ1*-derived dsRNA in *E. coli*. Plasmids purified from independent *E. coli* clones were separated by electrophoresis through an agarose gel, which was stained with ethidium bromide. Lane 0, DNA marker ladder with some of the sizes in bp on the left; lane 1, control plasmid pLELVd expressing an empty ELVd; lanes 2 to 13, plasmids pLELVd-DvSSJ1 to express the *DvSSJ1*-derived dsRNA on an ELVd scaffold obtained from 12 independent *E. coli* colonies.

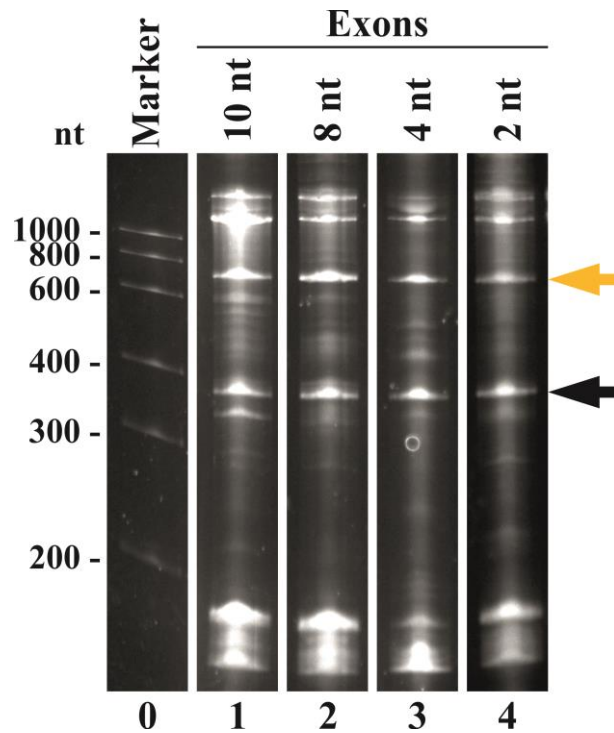

1137

1138

1139 **Supplemental Figure S2.** Effect of exon size in *T. thermophila* intron processing in the ELVd-  
1140 based system to produce dsRNA in *E. coli*. Aliquots of RNA preparations from *E. coli* clones  
1141 cotransformed with p15LtRnlSm and a series of pLELVd derivatives to produce a 100-bp  
1142 dsRNA, in which the exons that flank the *T. thermophila* intron are increasingly shorter, as  
1143 indicated, were separated by denaturing PAGE. The gel was stained with ethidium bromide.  
1144 Lane 0, RNA marker with sizes (in nt) on the left; lanes 1 to 4, RNAs from constructs with 10,  
1145 8, 4 and 2-nt exons, respectively. Orange and black arrows point the positions of the  
1146 recombinant ELVd-dsRNA and the spliced introns, respectively.

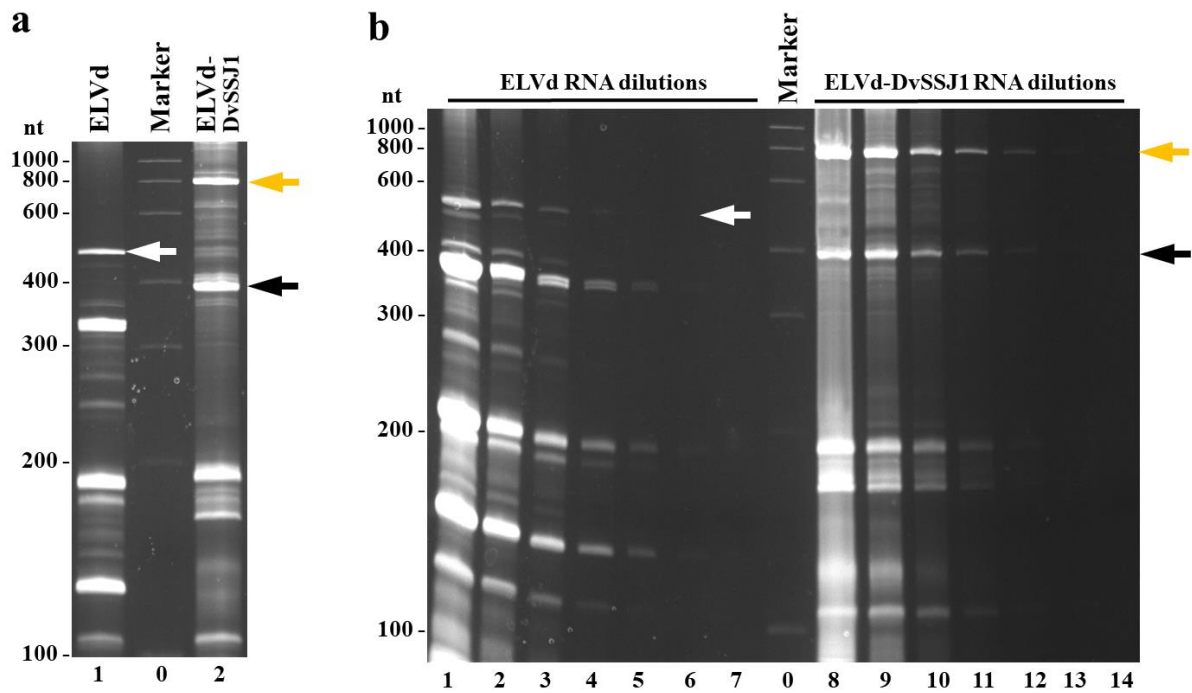

1147

1148

1149

1150

1151

1152

1153

1154

**Supplemental Figure S3.** Large scale RNA preparations produced in *E. coli* by means of the viroid-based system and used in the WCR bioassay. RNAs were separated by denaturing PAGE and the gels stained with ethidium bromide. (a and b) Lane 0, RNA marker ladder with sizes in nt on the left. (a) Lanes 1 and 2, large-scale RNA preparations from *E. coli* transformed with p15LtRnlSm and pLELVd or pLELVd-DvSSJ1, respectively. (b) Dilution analysis of the ELVd (lanes 1 to 7) and the ELVd-DvSSJ1 (lanes 8 to 14) RNA preparations. White, orange and black arrows point to ELVd, ELVd-DvSSJ1 and spliced-intron RNAs, respectively.

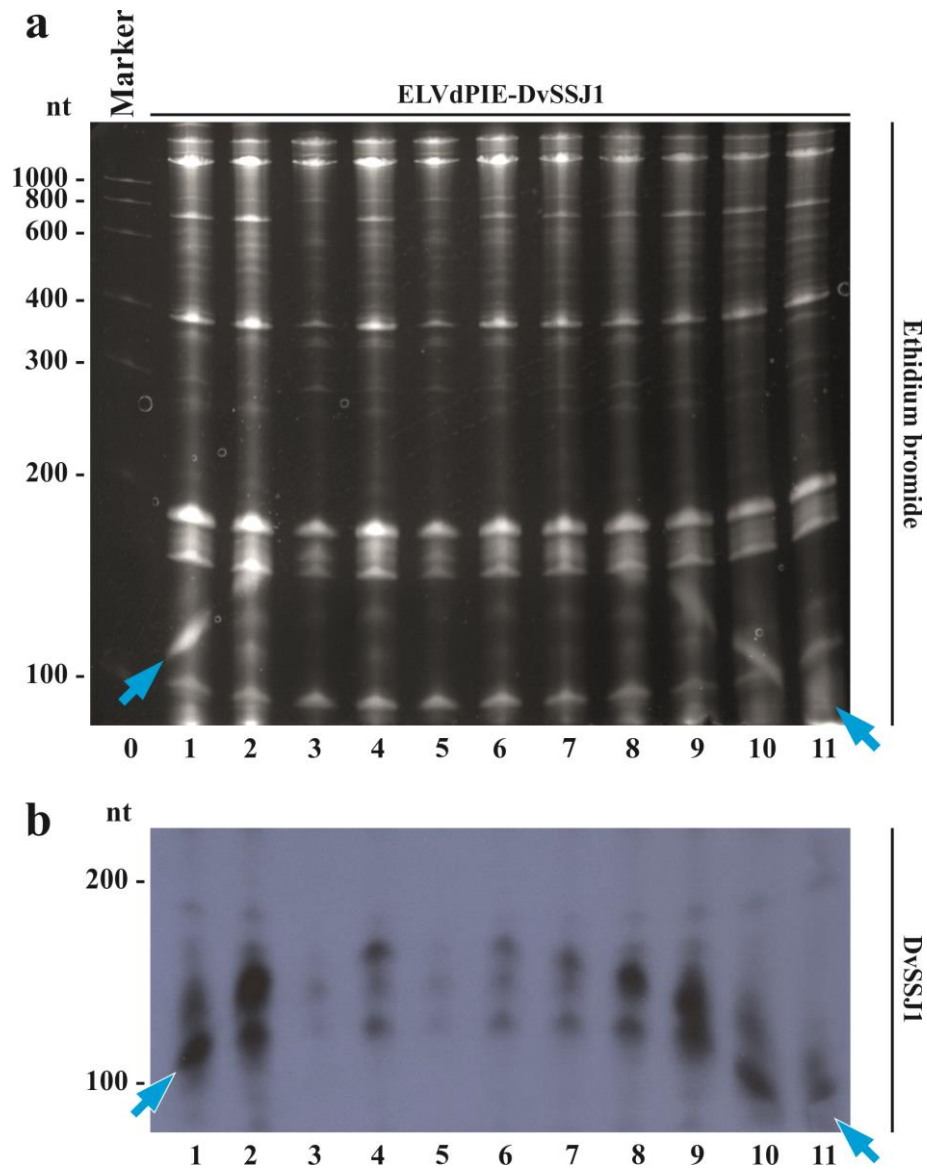

1155  
1156  
1157  
1158  
1159  
1160  
1161  
1162

**Supplemental Figure S4.** Analysis of the recombinant circular dsRNA. RNA preparations from different *E. coli* clones (lanes 1 to 11) co-transformed with p15LtRnlSm and pLELVdPIE-DvSSJ1 were separated by denaturing PAGE. The gel was (a) stained with ethidium bromide and (b) the RNA transferred to a membrane and hybridized with a  $^{32}\text{P}$ -labelled probe to detect DvSSJ1 RNA. Lane 0, RNA marker with sizes in nt on the left. Blue arrows point to the recombinant circular dsRNA that exhibits an inverted smile migration across the gel.

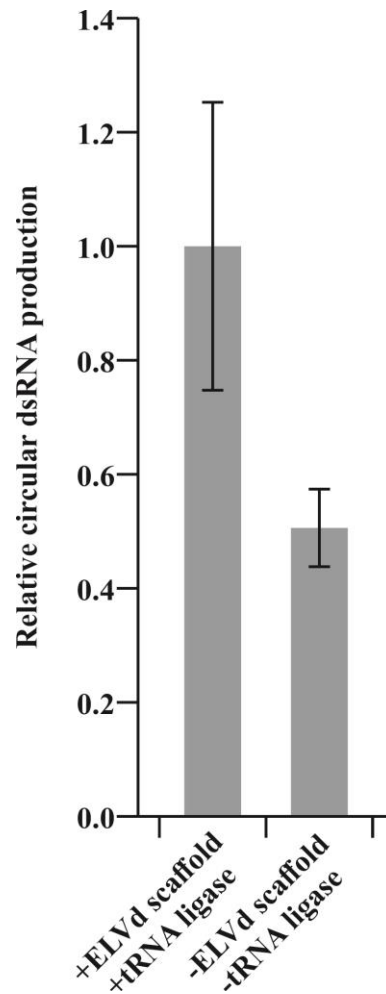

1163

1164

1165 **Supplemental Figure S5.** Effect of the the ELVd scaffold and the tRNA ligase on  
1166 accumulation of a recombinant circular dsRNA. RNA preparations from *E. coli* clones  
1167 cotransformed with p15LtRnlSm and a pLELVdPIE-derivative to produce a 100-bp dsRNA or  
1168 the empty ligase plasmid (p15CAT) and a pLPIE-derivative (no ELVd scaffold) to produce the  
1169 same 100 bp dsRNA were separated by denaturing PAGE. After staining the gels with ethidium  
1170 bromide, recombinant circular dsRNA accumulation was quantified (in fluorescence arbitrary  
1171 units) using an image analyzer. Normalized average fluorescence is plotted. Error bars represent  
1172 standard deviation (n = 5).

1173



1174 **Supplemental Table S1.** Primers used in the PCR amplifications to build expression plasmids  
1175 pLELVd-DvSSJ1, pLELVdPIE-DvSSJ1 and pLPIE-DvSSJ1.  
1176

| Name  | Sequence (5' to 3')                               |
|-------|---------------------------------------------------|
| D2623 | ACCATTGTCCTGAAATTGCTGAAGTTGGTGATCAATTTGATATGTCTCA |
| D2624 | AAGAAGTAGCCTTGATATCCGGTTCGGTACAAGATGAGACATATCAAAT |
| D2625 | CCTCTCCCCCTCCCAGGTAATATCCCCTTACCATTGTCTGAAATTG    |
| D2626 | TTTAGAGAGTCATAAGAAGTAGCCTTGATATCCG                |
| D2627 | AAGGCTACTTCTTATGACTCTCTAAATAGCAATATTTAC           |
| D2628 | AAGGCTACTTCTTGGCTACCTTACGAGTACTCC                 |
| D2629 | TCGTAAGGTAGCCAAGAAGTAGCCTTGATATCCG                |
| D2630 | ACCCACCCTCCTAGGGAACACATCCTTGAACCATTGTCTGAAATTG    |
| D2936 | AAGGGGATAGTACCTGGGAG                              |
| D2937 | ACCATTGTCCTGAAATTGCTG                             |
| D2940 | ACCATTGTCCTGAAATTG                                |
| D2941 | TCAAGGATGTGTTCCCTAG                               |
| D3606 | CTTCTGTTGATATGGATG                                |
| D3285 | CAGCGTTACAAGTATTACAC                              |
| D3607 | GAAATCATCCTTAGCGAAAGC                             |
| D3608 | ATCTGTTGACTTAGGACTTGGC                            |

1177

1178
